# Supplementary material for: Metabolic Profiling of healthy and cancerous tissues in 2D and 3D
Source: PubMed Central journal article supplement (PMC5681543; doi:10.1038/s41598-017-15325-5), 2017-11-10

Title: **Metabolic Profiling of healthy and cancerous tissues in 2D and 3D**

Authors: Shonagh Russell<sup>1,4</sup>, Jonathan Wojtkowiak<sup>3</sup>, Andy Neilson<sup>2</sup>, Robert J. Gillies<sup>1</sup>

Affiliations:

<sup>1</sup>Department of Cancer Imaging and Metabolism, H Lee Moffitt Cancer Centre and Research Institute, Tampa, FL, USA.

<sup>2</sup>Agilent Technologies (Seahorse Bioscience), 5301 Stevens Creek Blvd., Santa Clara, CA, 95051, USA.

<sup>3</sup>Genentech Inc., 15 Pemberton Rd, Wayland, MA, 01778, USA.

<sup>4</sup>University of South Florida, Tampa, FL, USA.

Corresponding Author:

Robert J. Gillies, Department of Imaging and Metabolism, Moffitt Cancer Centre, 12902 Magnolia Drive, Tampa, FL, USA, 33612. Email: [Robert.gillies@moffitt.org](mailto:Robert.gillies@moffitt.org)

A

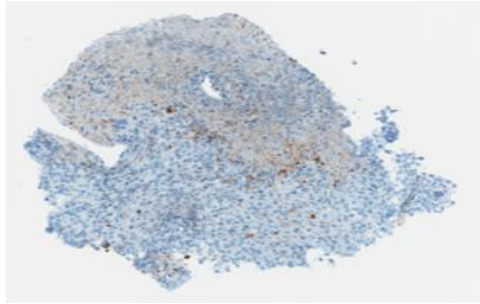

Cleaved Caspase 3

B

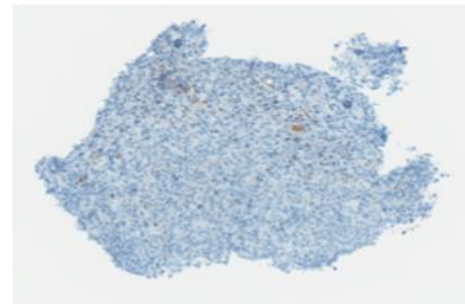

C

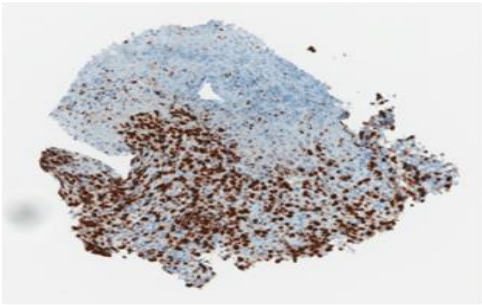

Ki67

D

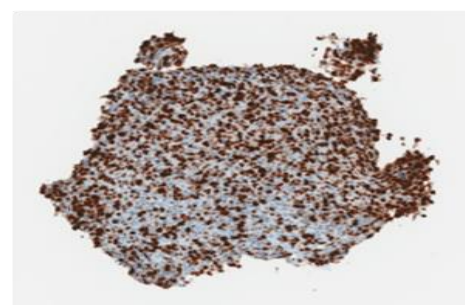

E

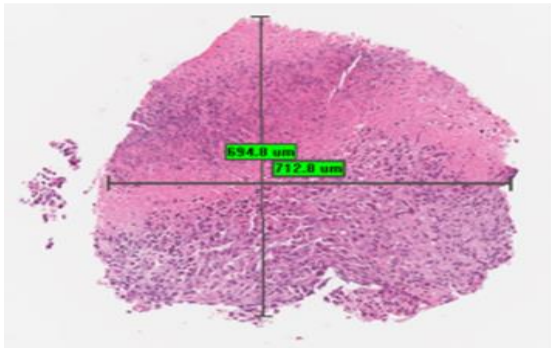

H&E

F

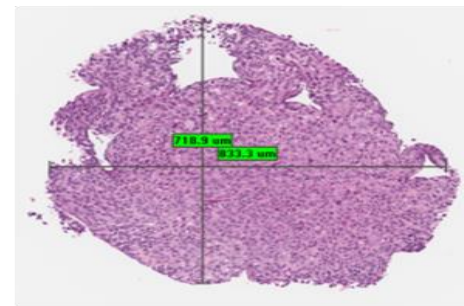

Supplemental Figure 1: A-F: Immunohistochemistry staining for Cleaved Caspase 3, Ki67 and hematoxylin and eosin of 2 individual microtissues from HCT116 mouse xenograft tumors.

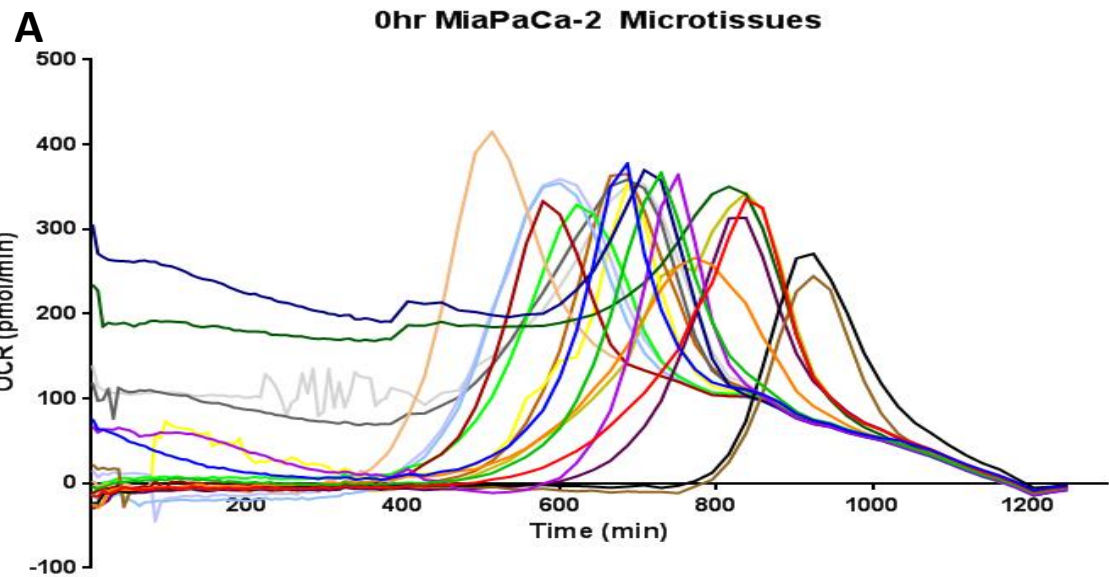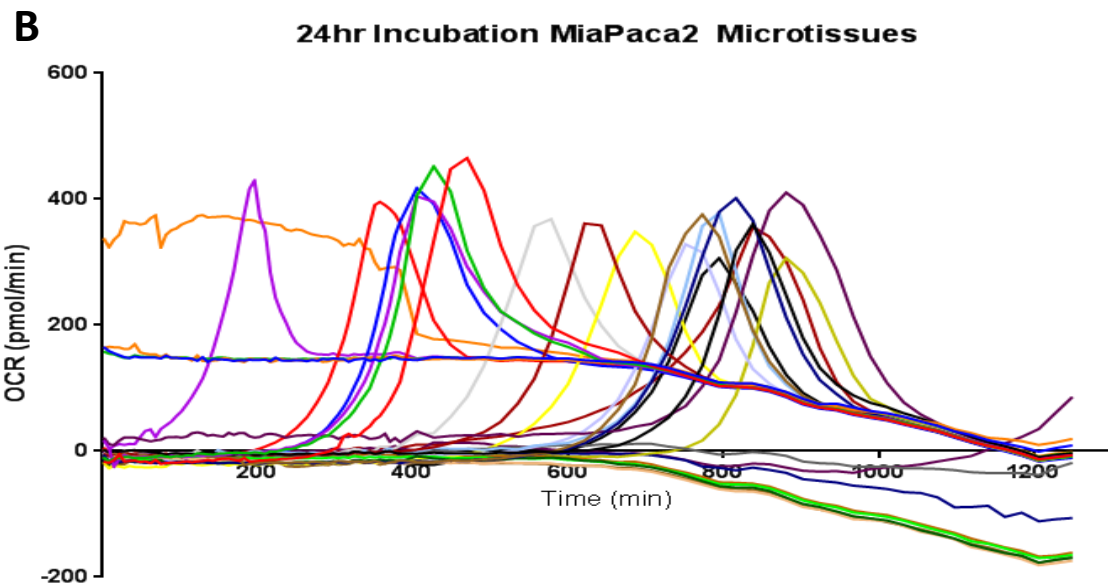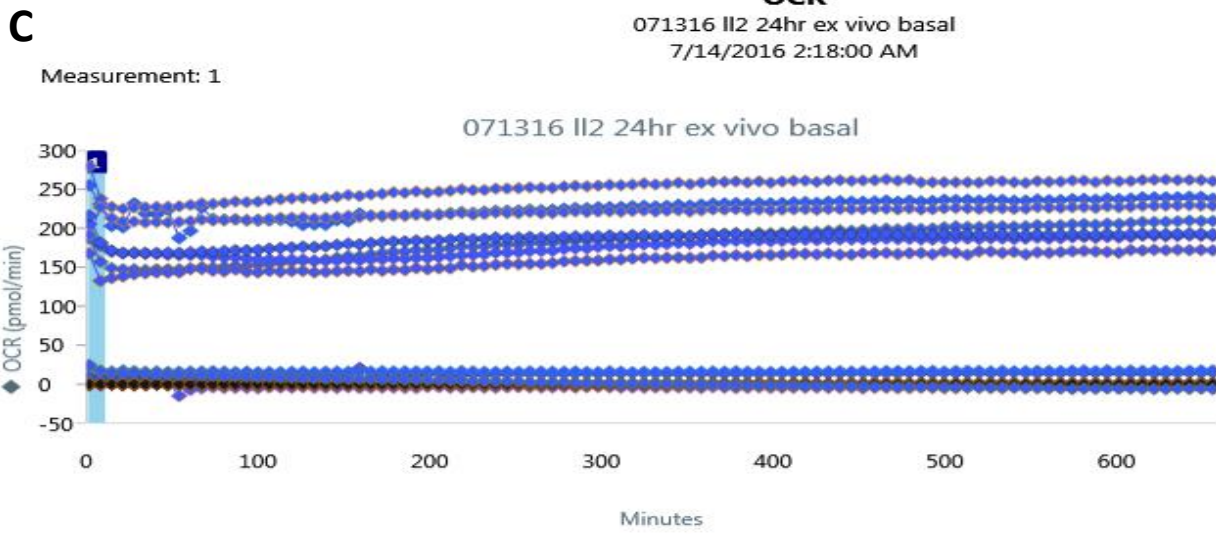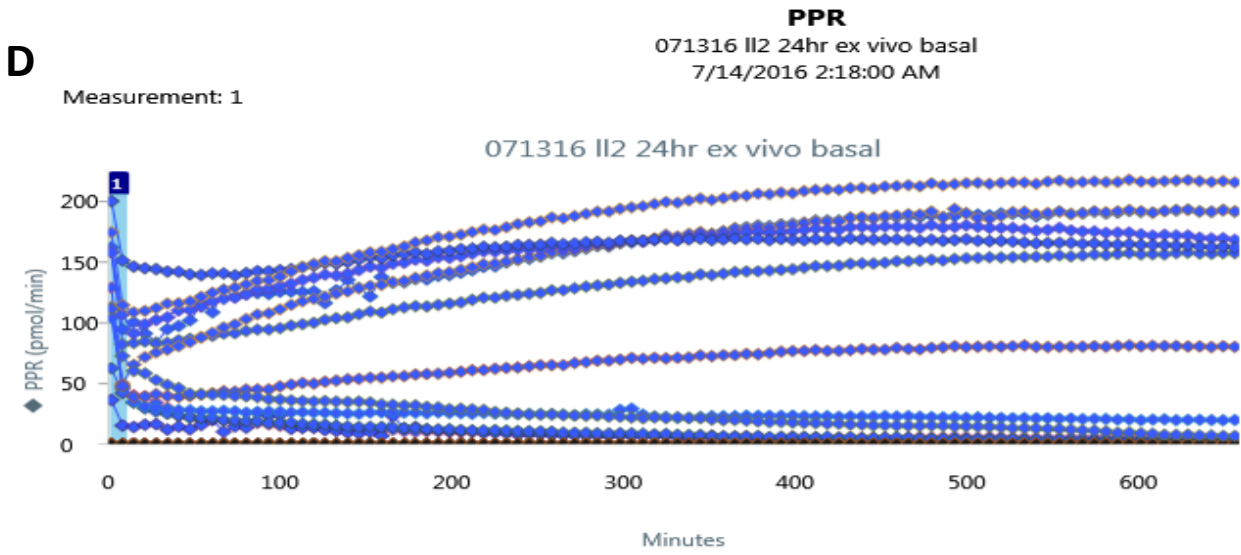

Background LL2 24hr ex vivo incubation

Background LL2 24hr ex vivo incubation

Supplementary Figure 2: Longevity studies of microtissues. A: 0hr *ex vivo* basal OCR measurements of MiaPaCa-2 microtissues. B: Post 24hr *ex vivo* incubation OCR rate of MiaPaCa-2 microtissues. C: Lewis lung cancer(LL2) microtissues post 24hr *ex vivo* incubation, basal OCR. D: Lewis lung cancer(LL2) microtissues post 24hr *ex vivo* incubation, basal PPR.

**A**

0hr

24hr

48hr

72hr

96hr

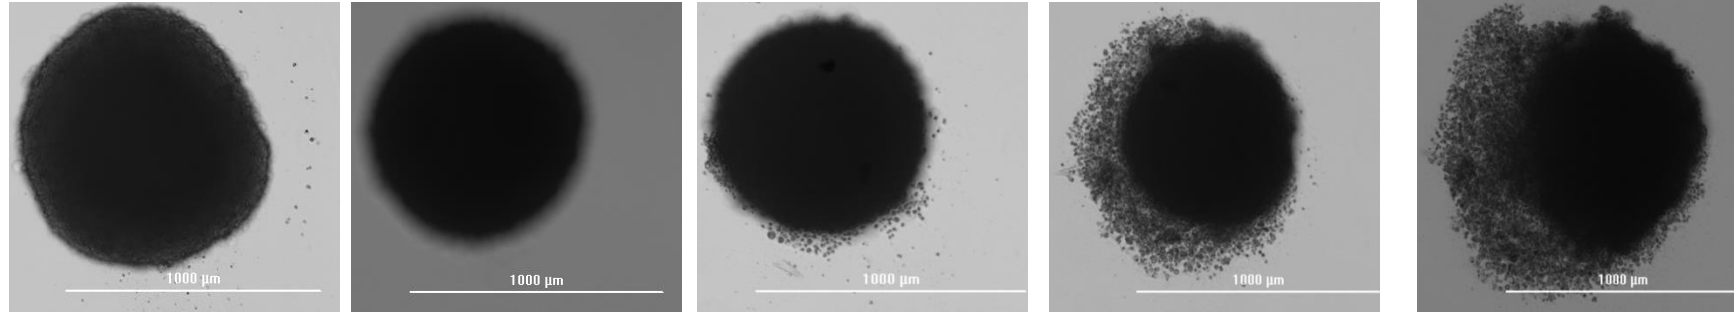**B**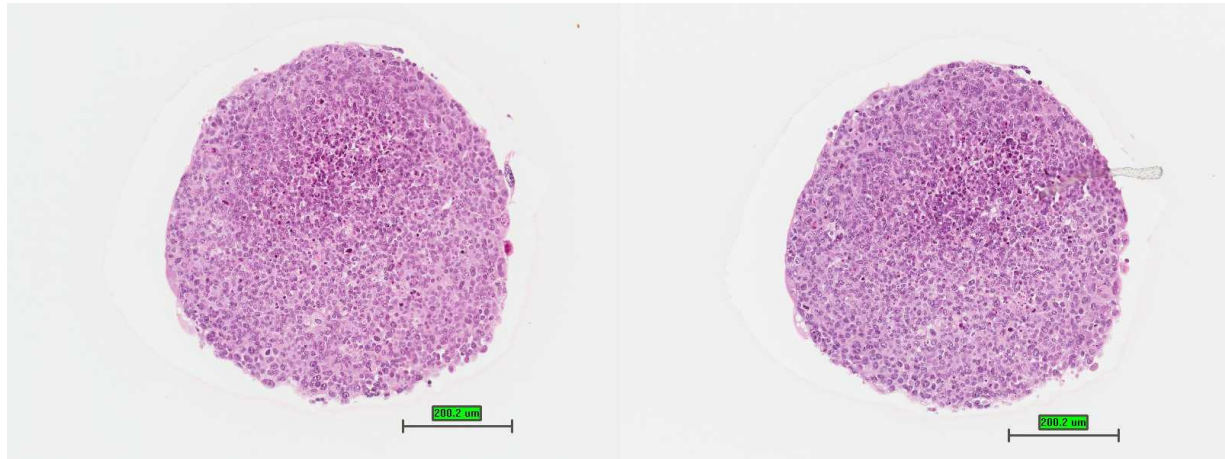**C**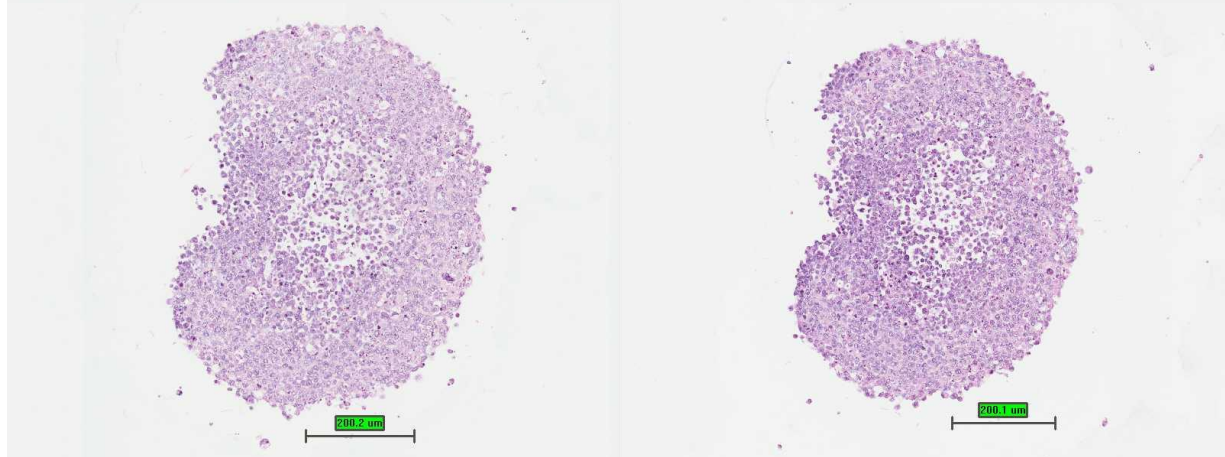

Supplementary Figure 3: **HCT116 Spheroids with 5FU Treatment**. A: Brightfield images of HCT116 spheroids treated with 2mM 5-FU for 96 hours, taken every 24 hours showing disruption of outer layer of cells. After removal of 5-FU treatment spheroids were unable to recover, cells disaggregated. N=6 per time point. Representative images shown. B: H & E staining of HCT116 spheroids untreated. C: H & E staining of HCT116 spheroids treated with 2mM 5Fu for 96hrs.

# Monolayer

HCT116

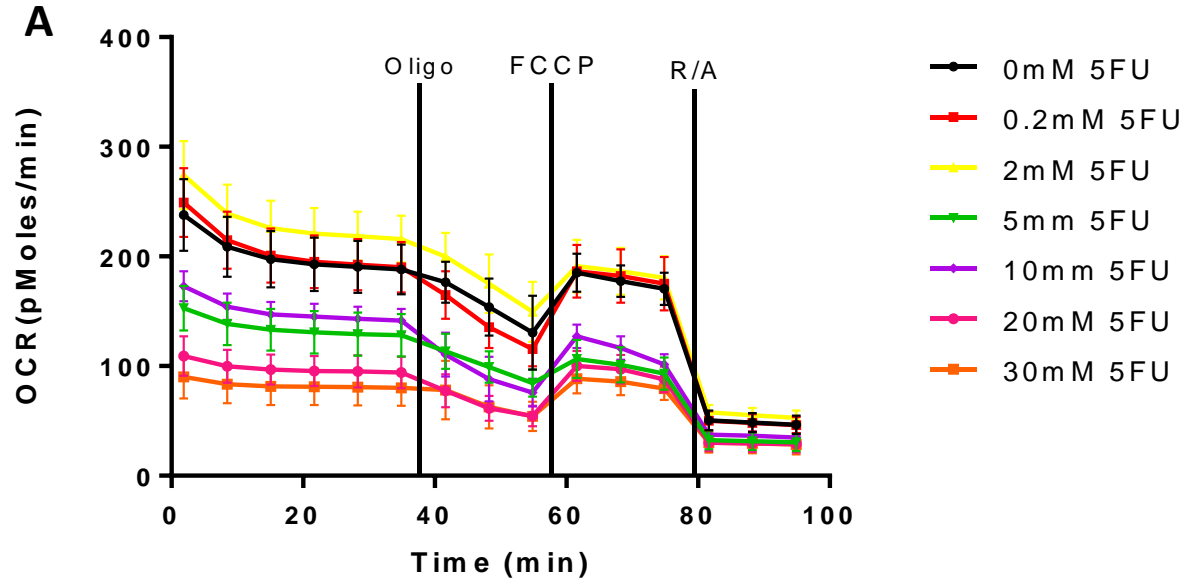

**C** HCT116 monolayer

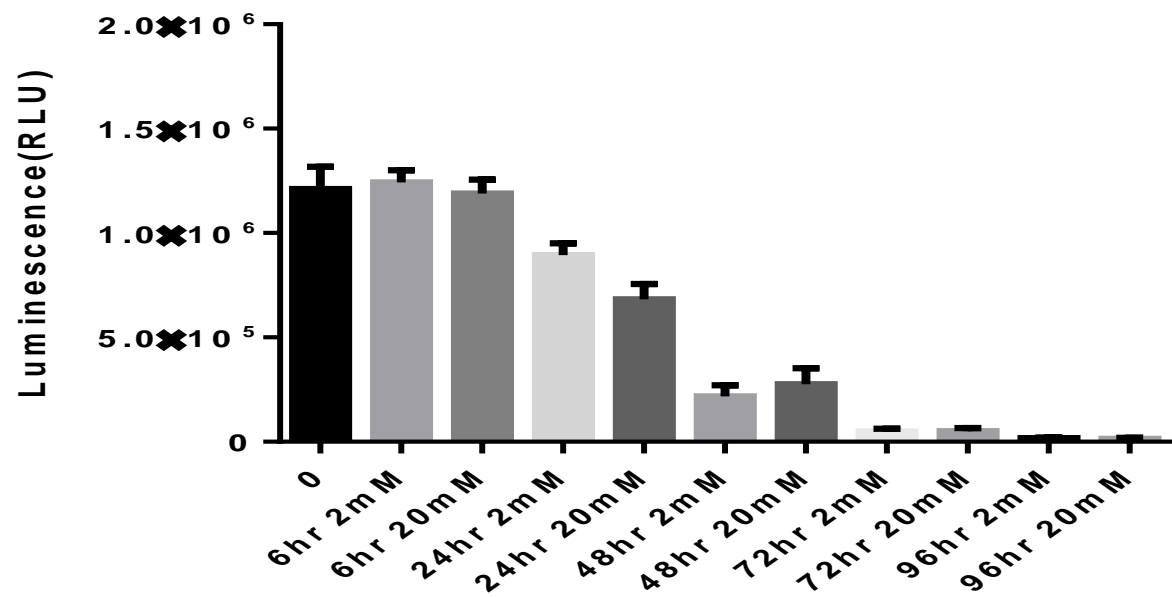

# Spheroid

5FU HCT116 Spheroids

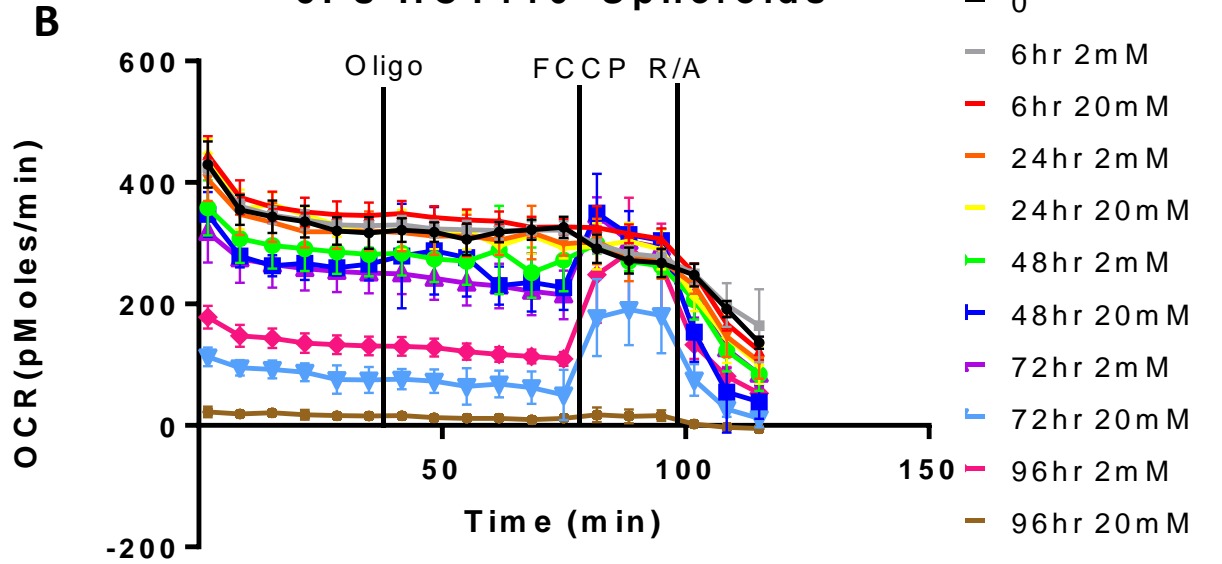

**D** HCT116 Spheroids

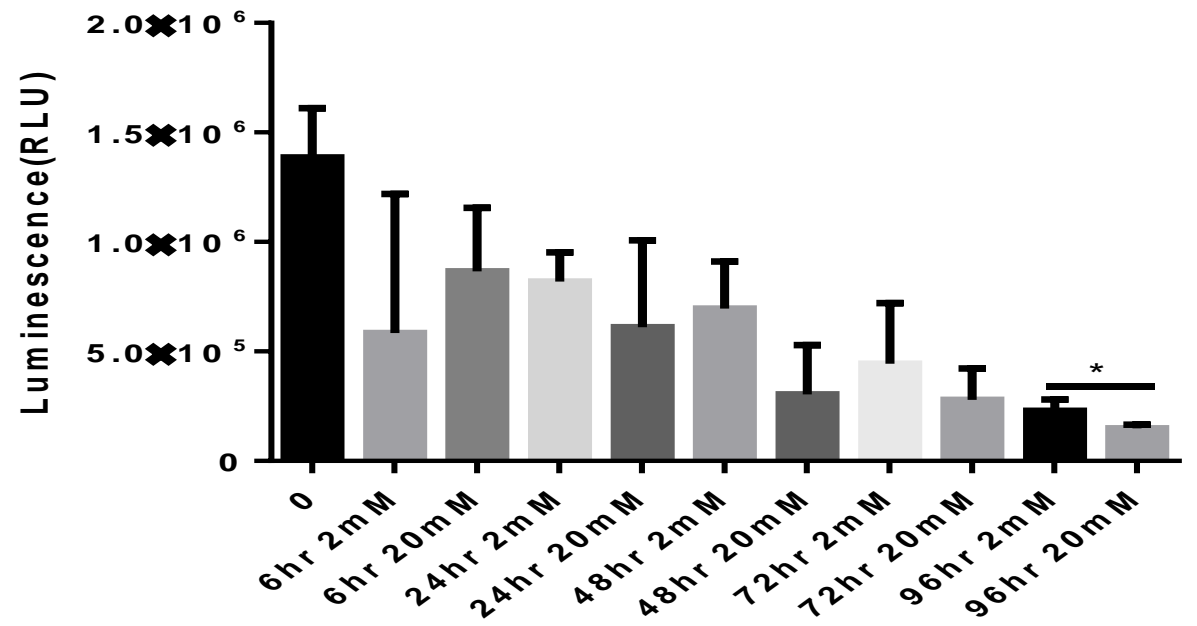



Supplementary Figure 4: **Effects of 5FU on 3D spheroid metabolic phenotype versus 2D monolayer in HCT116 colorectal cancer cell line.** A: Mitochondrial stress test on HCT116 monolayer treated with increasing 5FU concentrations, 0-30mM for 48hr. N=5 per group SD. B: Time course of 5FU treatment with 2mM or 20mM on HCT116 spheroids. Concentration decided from monolayer data. N=5 per group, SEM shown. C: Cell titer-Glo Luminescent Cell Viability ATP assay of HCT116 monolayer over 96hrs with 2 or 20mM 5FU treatment. D: Cell titer-Glo Luminescent Cell Viability ATP assay of HCT116 spheroid over 96hrs with 2 or 20mM 5FU treatment. N=5, SD shown.

# Monolayer

# Spheroids

**A**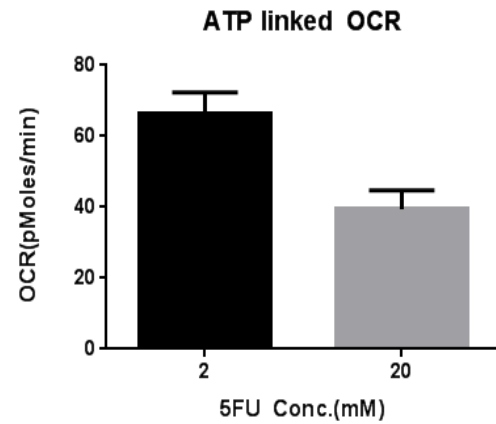**C**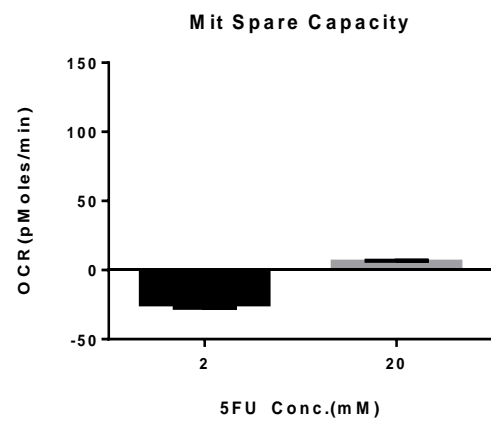**E**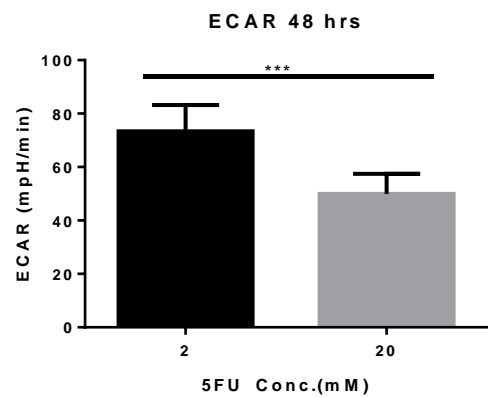**B**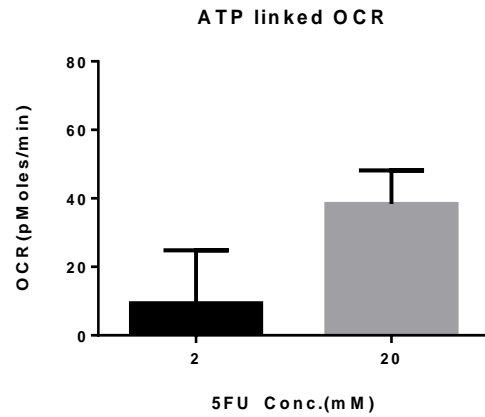**D**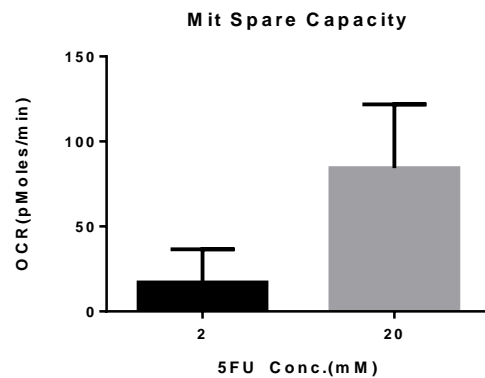**F**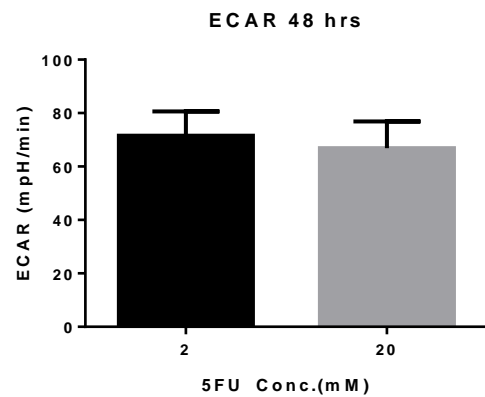**G**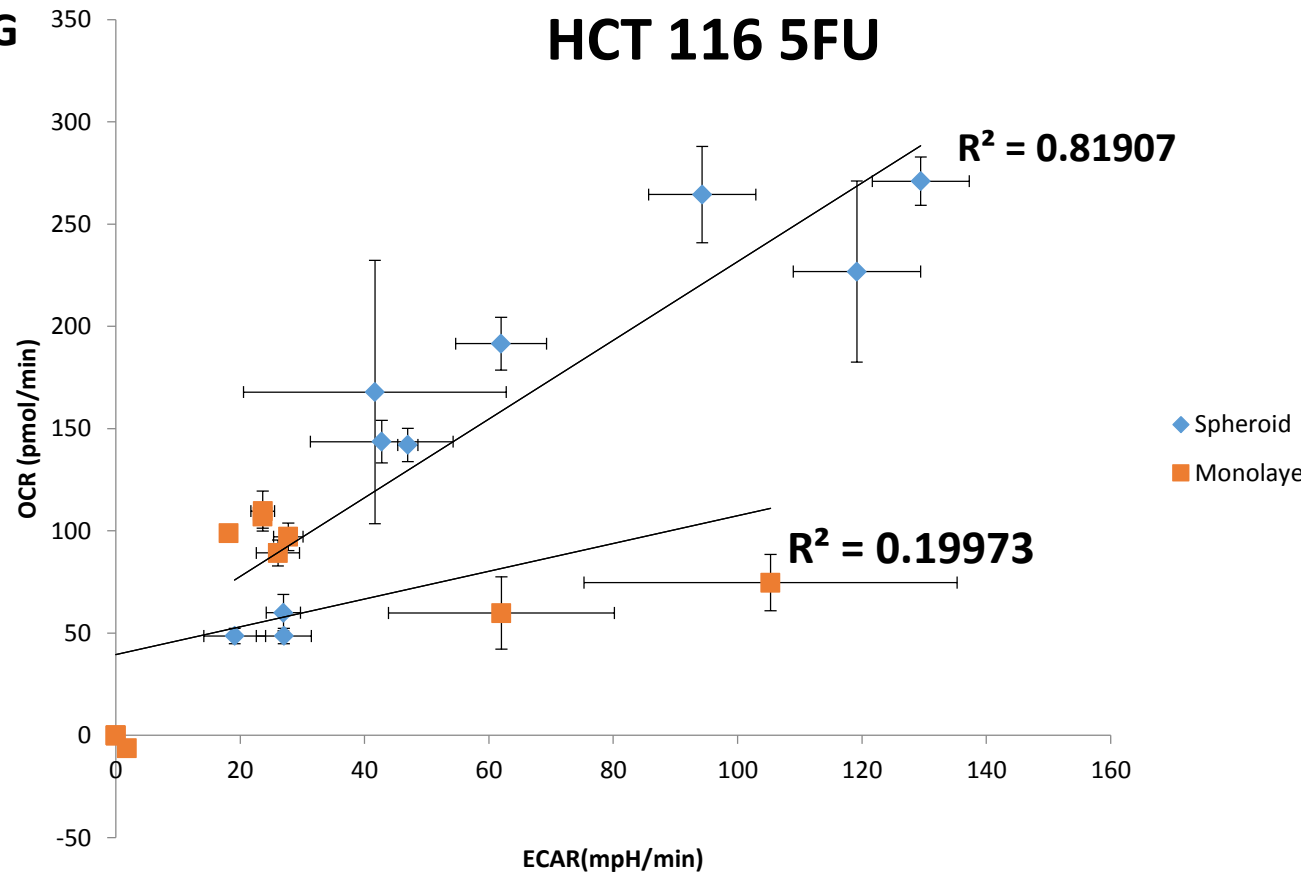

Supplementary Figure 5: **HCT 116 monolayer and spheroid metabolic phenotype after 48hr 5FU Treatment.** A: HCT116 monolayer ATP linked OCR with 5FU treatment. B: HCT116 spheroid ATP linked OCR with 5FU treatment. ATP linked OCR determined from difference between basal OCR and decrease upon oligomycin addition C: HCT116 monolayer mitochondrial spare respiratory capacity with 5FU treatment. D: HCT116 spheroid mitochondrial spare respiratory capacity with 5FU treatment. E: Basal ECAR of HCT116 monolayer prior to stress test after 48 hrs 5FU treatment. F: Basal ECAR of HCT116 spheroid monolayer after 48 hrs 5FU treatment. N=5, SEM shown. \*\*\*-  $p < 0.00$ . G: OCR: ECAR energy profile of HCT116 spheroid vs monolayer of response to 5FU treatment.

# HCT-116 Rapamycin 24hr

**OCR**  
monolayer hct116 fu rap 11-12-14 (2)  
11/12/2014 3:14:47 PM

Measurement: 1

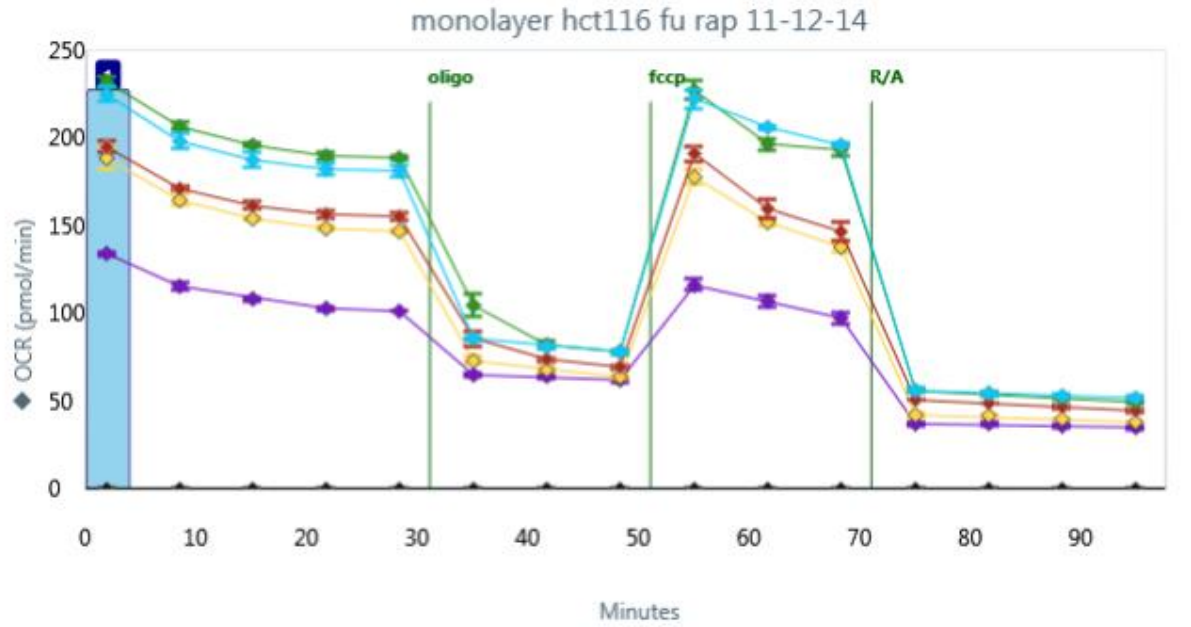

Background Untreated MST 5um rap ON 1um rap ON 0.3um rap ON 0.1um rap O

**OCR**  
hct116 5fu rap mst 11-5-14  
11/5/2014 3:43:03 PM

Measurement: 6

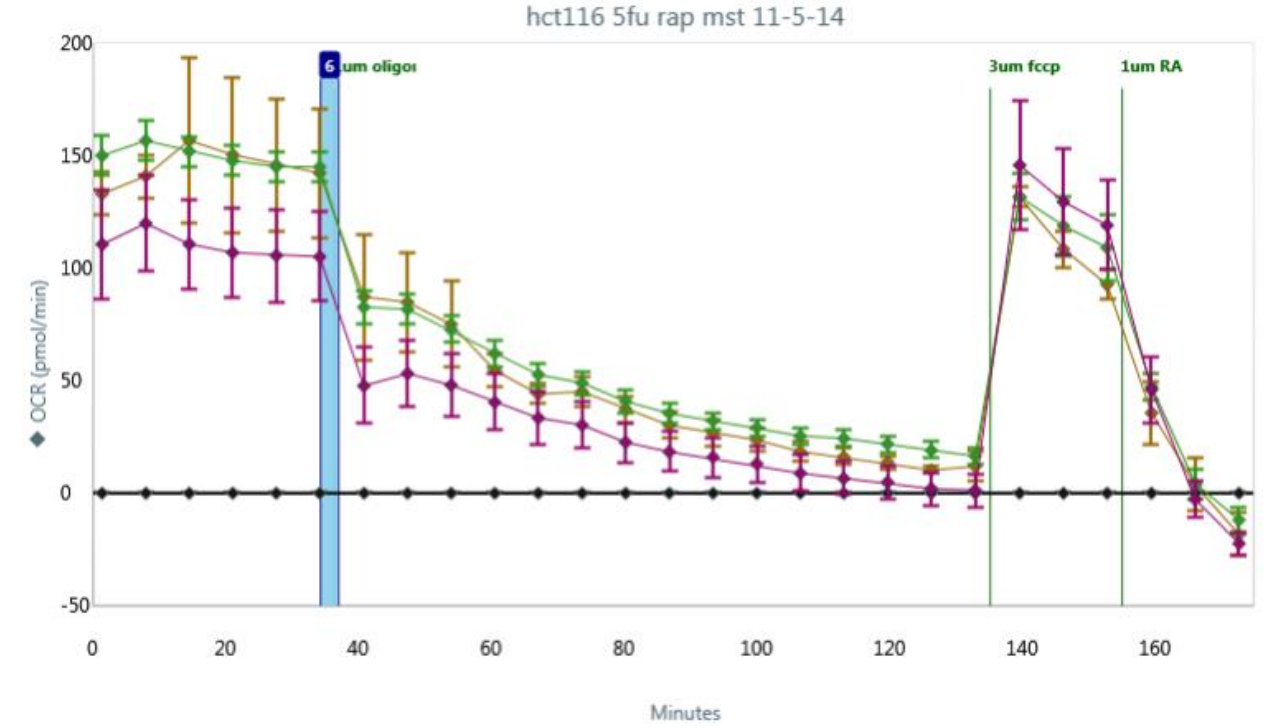

Background untreate mst 5um rap on 0.3um rap on

Supplementary Figure 6: **Effects of rapamycin on 3D spheroid metabolic phenotype versus 2D monolayer in HCT116 colorectal cancer cell line.** A: Mitochondrial stress test on HCT116 monolayer treated with increasing rapamycin concentrations, 0-5 $\mu$ M overnight. N=5 per group SD. B: Mitochondrial stress test on HCT116 spheroids treated with 5 $\mu$ M or 0.3 $\mu$ M of rapamycin overnight. N=5 per group, SEM shown.

**A**

**OCR**  
a549 spheroids foretanib timecourse 030915  
3/9/2015 5:27:06 PM

Measurement: 4

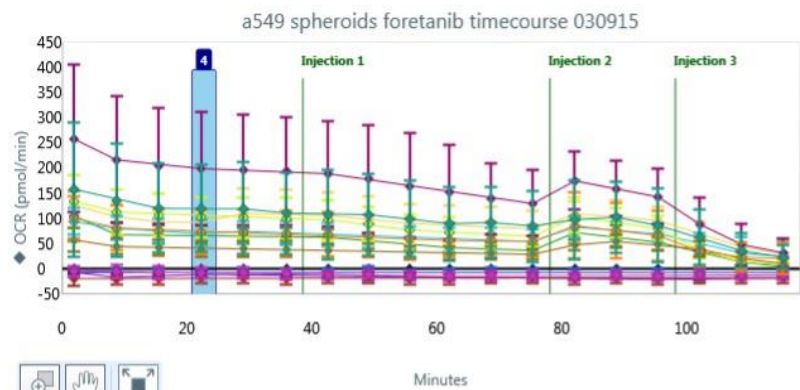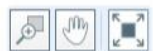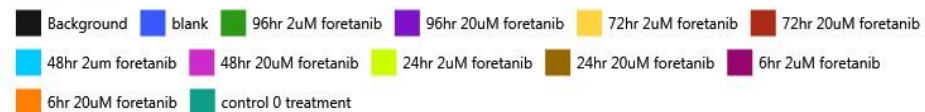**C**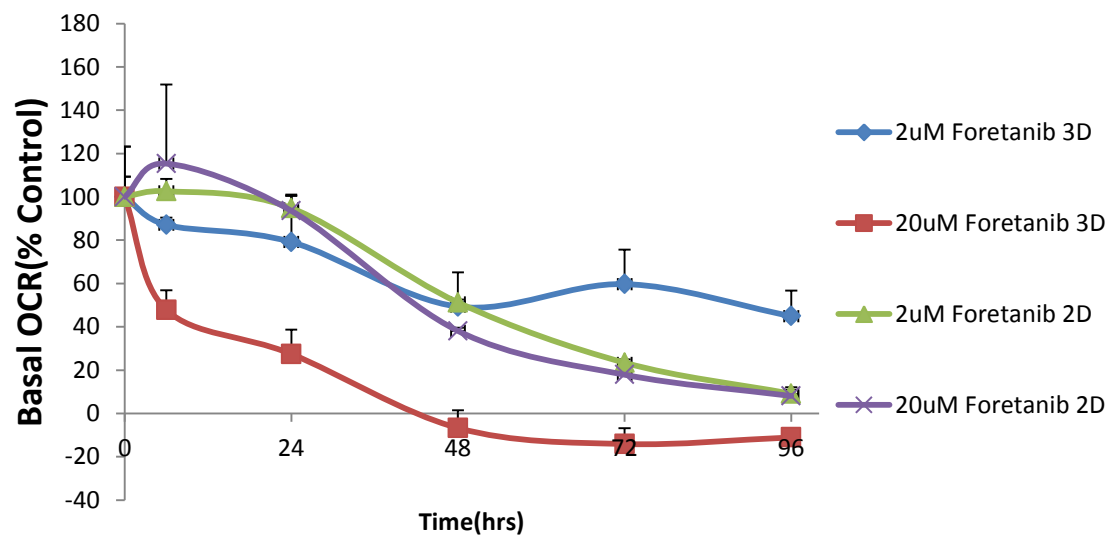**B**

**OCR**  
A549 monolayer foretanib timecourse1 030915  
3/10/2015 8:35:16 AM

Measurement: 1

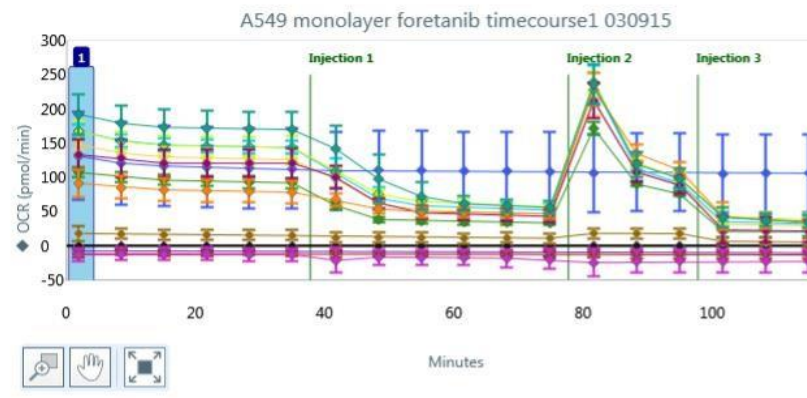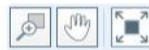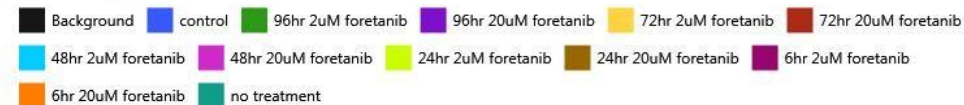**D**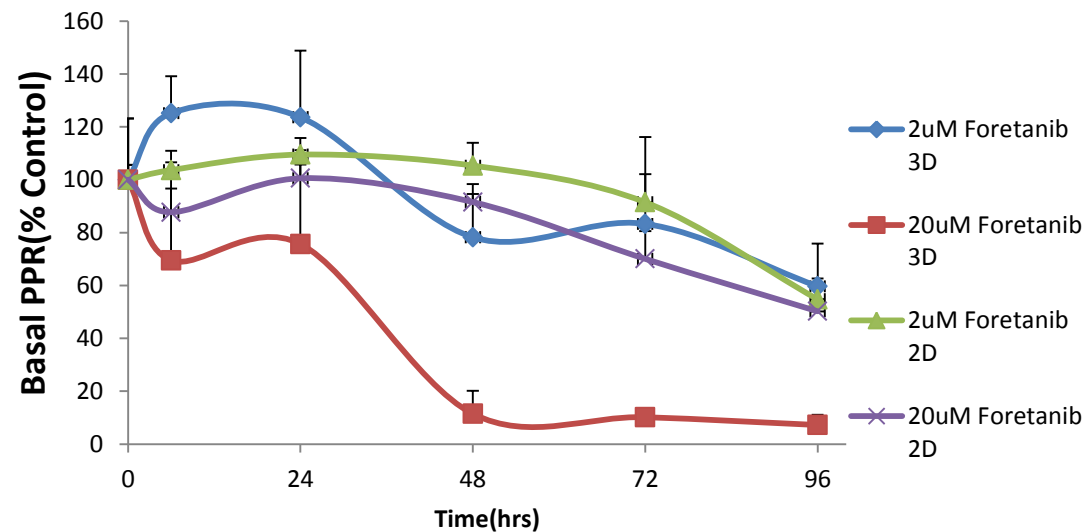

**Supplemental Figure 7: Effects of foretanib on 3D spheroid metabolic phenotype versus 2D monolayer in A549 human lung adenocarcinoma epithelial cell line.** A: Mitochondrial stress test on A549 monolayer treated with 2uM or 20uM of foretanib over 96hrs. N=5 per group, SD shown. B: Mitochondrial stress test on A549 spheroids treated with 2uM or 20uM of foretanib over 96hrs. N=5 per group, SD shown. C: Basal OCR as % control (from measurement 6) at each time point with 2 or 20uM foretanib treatment, 2D vs 3D. D: Basal PPR as % control (from measurement 6) at each time point with 2 or 20uM foretanib treatment, 2D vs 3D.

# A549

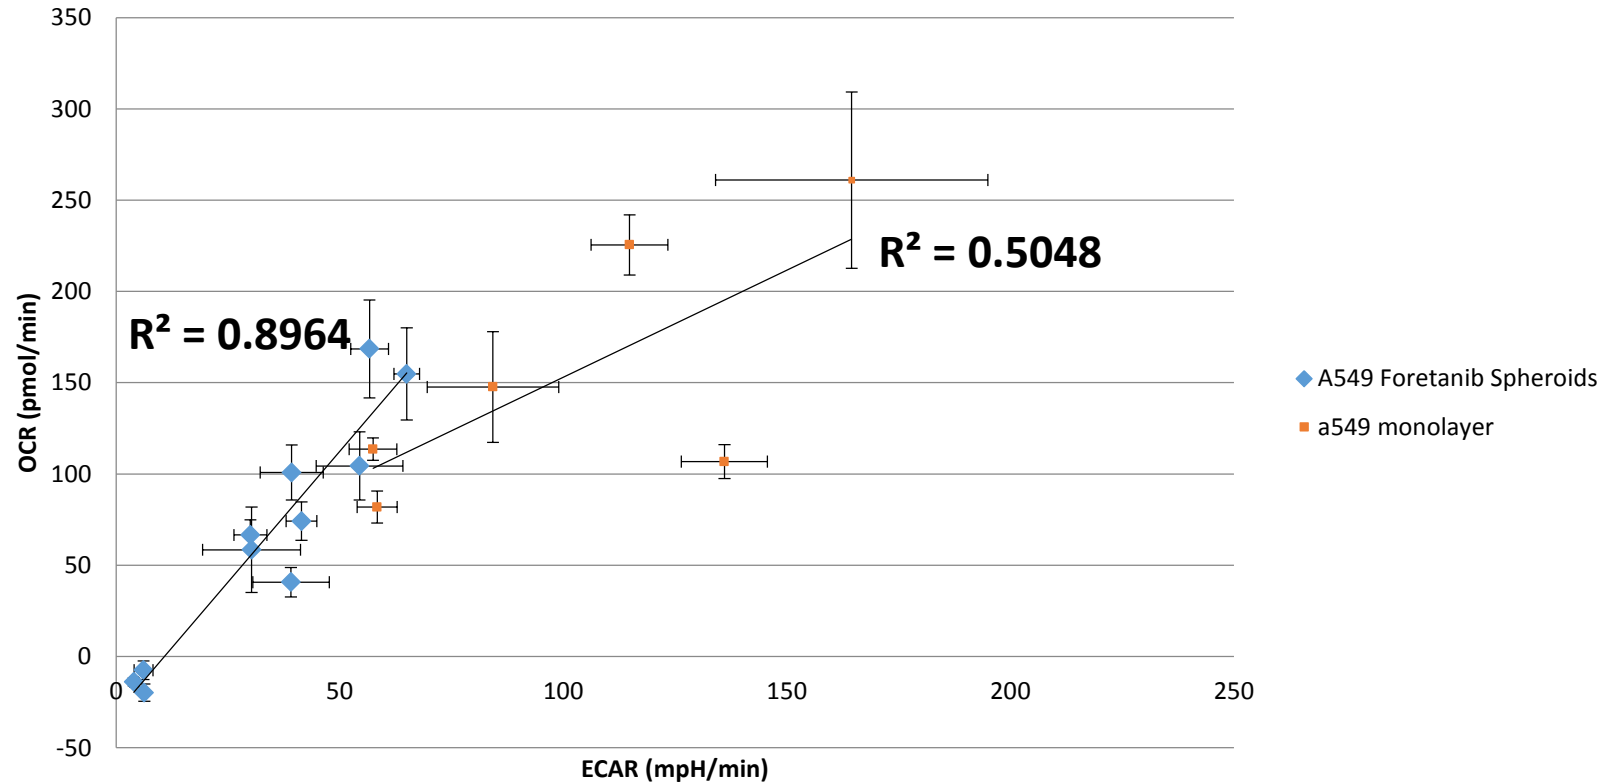

Foretanib is an ATP competitive inhibitor of VEGFR and HGFR. Involved in angiogenesis, migration, proliferation.



Supplemental Figure 7 (Cont.) E: OCR: ECAR energy profile of A549 spheroid vs monolayer in response to 20uM foretanib treatment over 96hrs. SD shown.

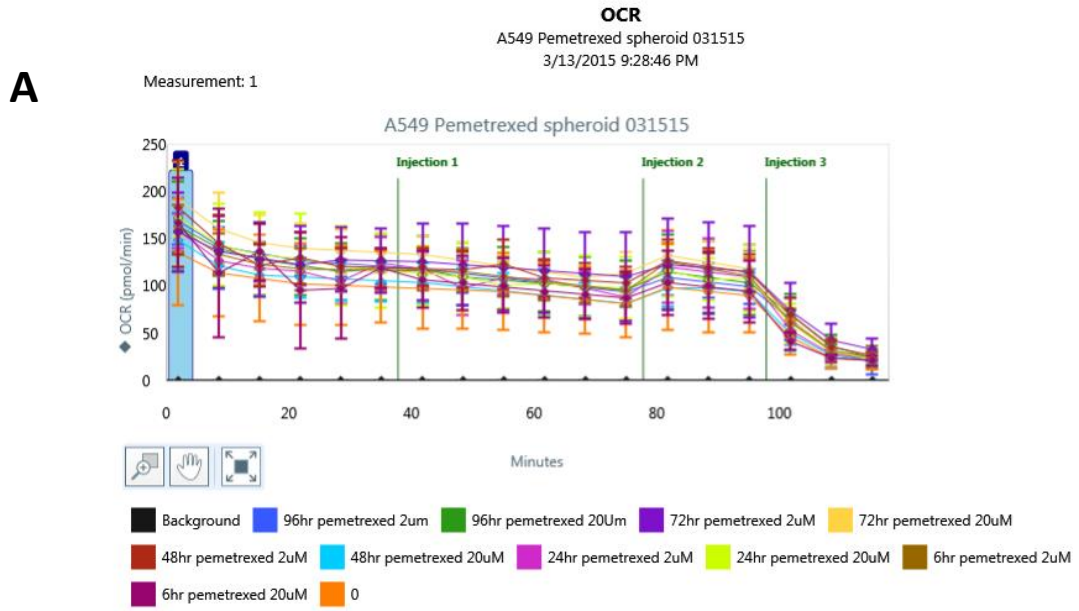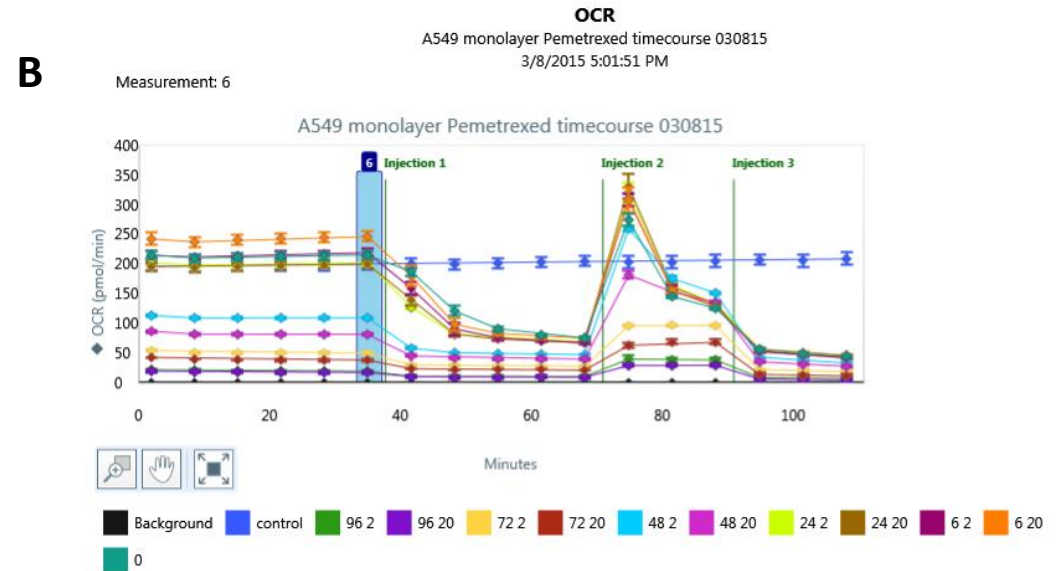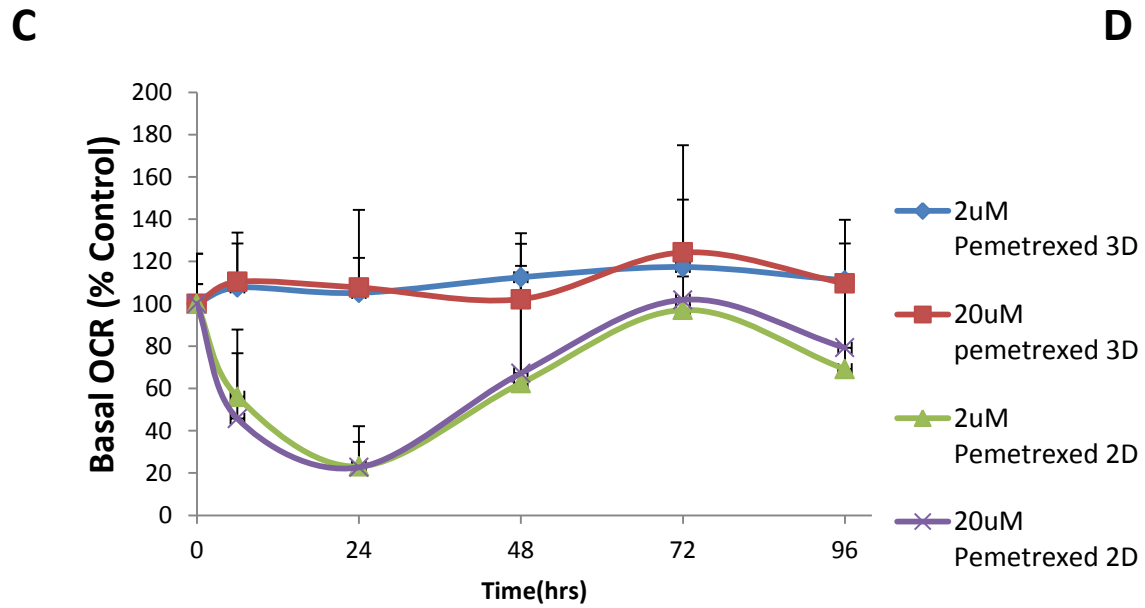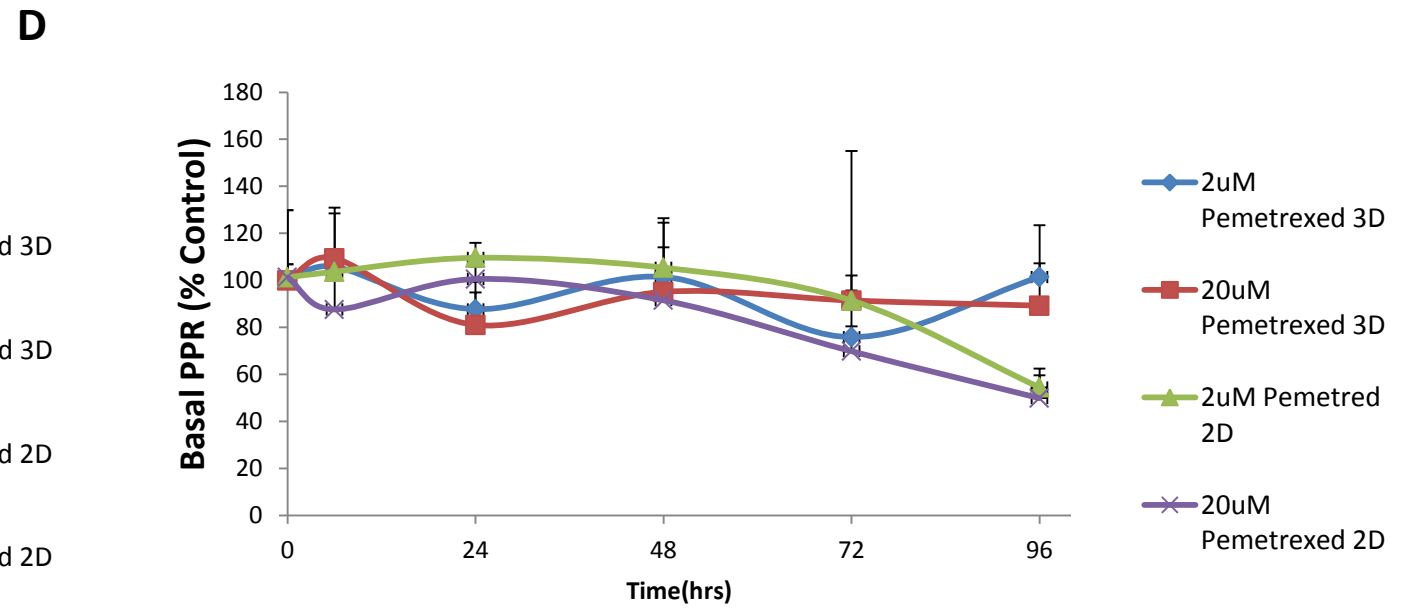

**Supplemental Figure 8: Effects of pemetrexed on 3D spheroid metabolic phenotype versus 2D monolayer in A549 human lung adenocarcinoma epithelial cell line.** A: Mitochondrial stress test on A549 monolayer treated with 2uM or 20uM pemetrexed over 96hrs. N=5 per group, SD shown. B: Mitochondrial stress test on A549 spheroids treated with 2uM or 20uM pemetrexed over 96hrs. N=5 per group, SD shown. C: Basal OCR as % control (from measurement 6) at each time point with 2 or 20uM pemetrexed treatment, 2D vs 3D. D: Basal PPR as % control (from measurement 6) at each time point with 2 or 20uM pemetrexed treatment, 2D vs 3D.

**A**

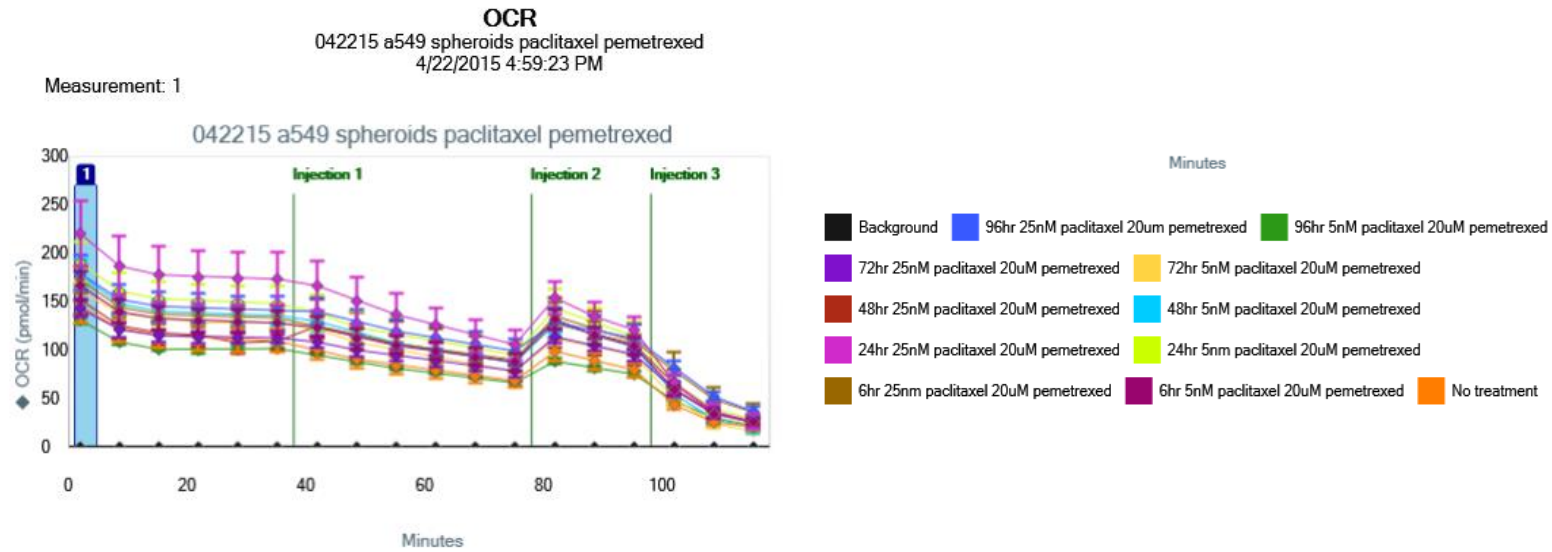

**B**

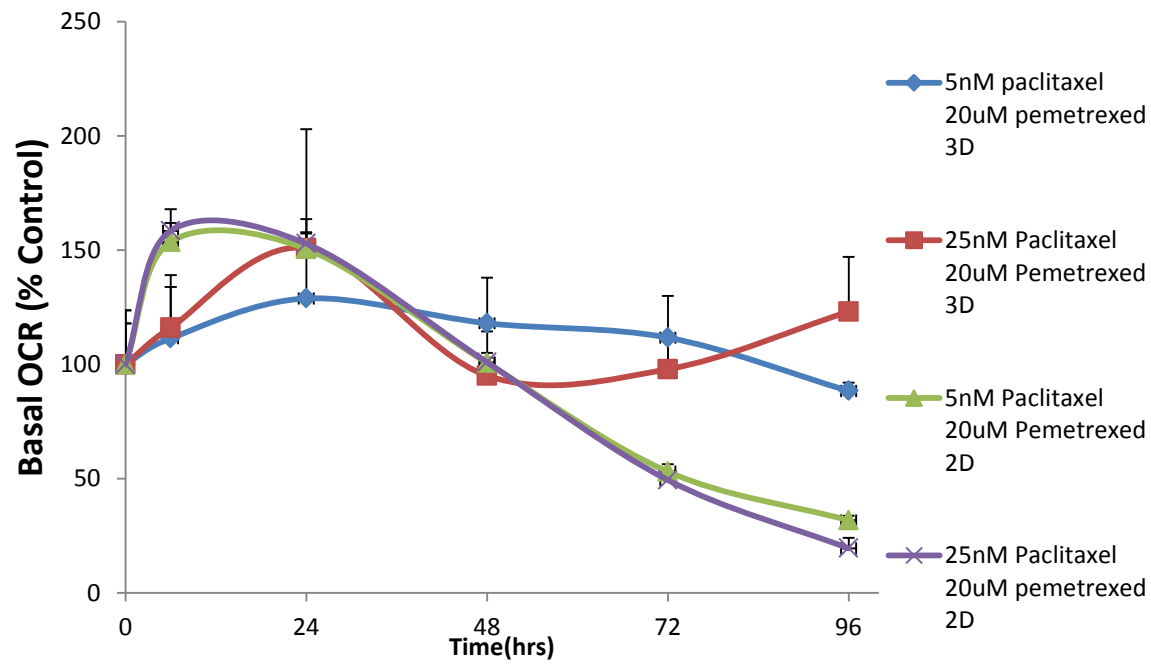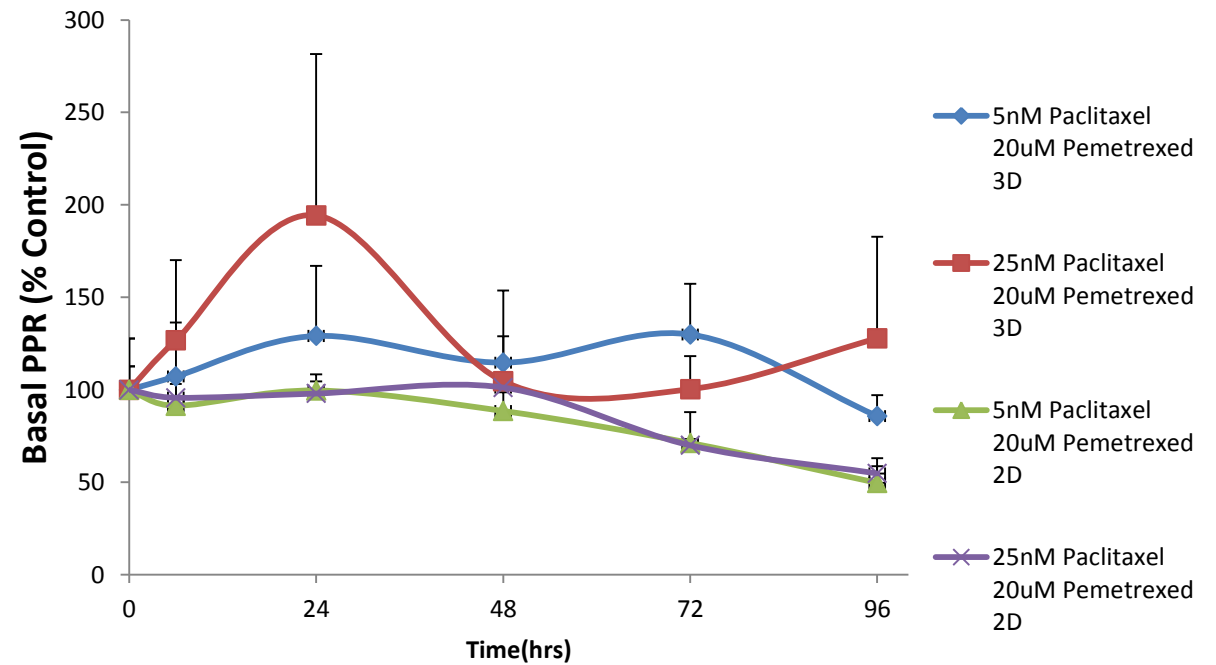

Supplementary Figure 9: **Effects of dual treatment with paclitaxel and pemetrexed on spheroid metabolism.** A: Mitochondrial stress test of HCT116 spheroids treated in combination with 5 or 25nM paclitaxel and 20uM pemetrexed. B: Basal OCR, % control of monolayer and spheroid HCT116 with 5 or 25nM paclitaxel plus 20uM pemetrexed treatment for 48hr. C: Basal PPR, % control of monolayer and spheroid HCT116 with 5 or 25nM paclitaxel plus 20uM pemetrexed treatment for 48hr.

**A**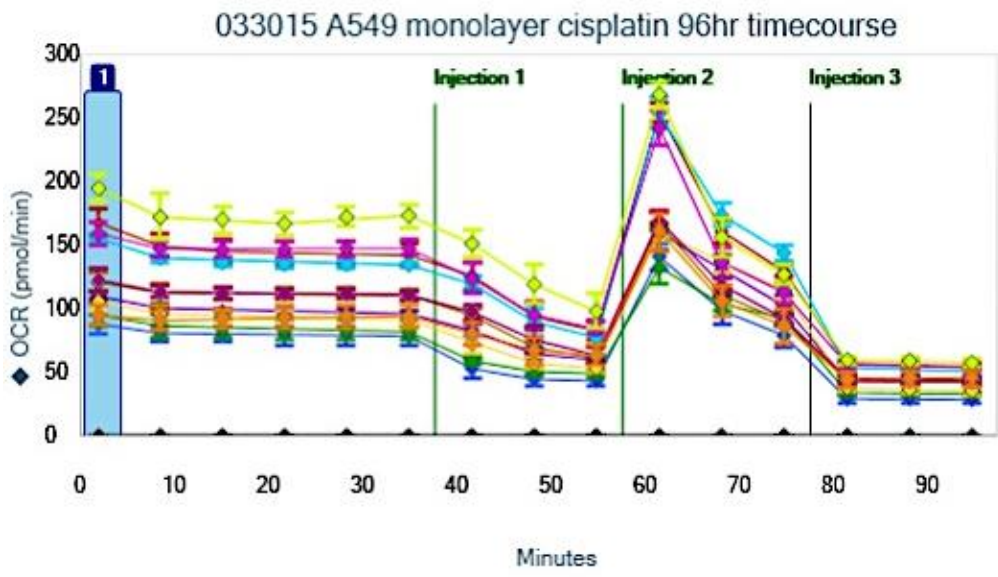**B**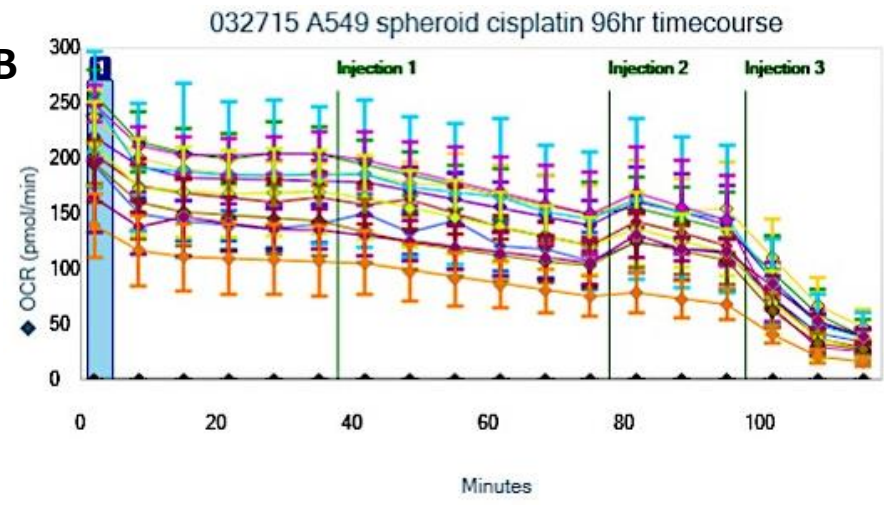

- Background
- 96hr 25uM cisplatin
- 96hr 50uM cisplatin
- 72hr 25uM cisplatin
- 72hr 50uM cisplatin
- 48hr 25uM cisplatin
- 48hr 50uM cisplatin
- 24hr 25uM cisplatin
- 24hr 50uM cisplatin
- 6hr 25uM cisplatin
- 6hr 50uM cisplatin
- No treatment

**C**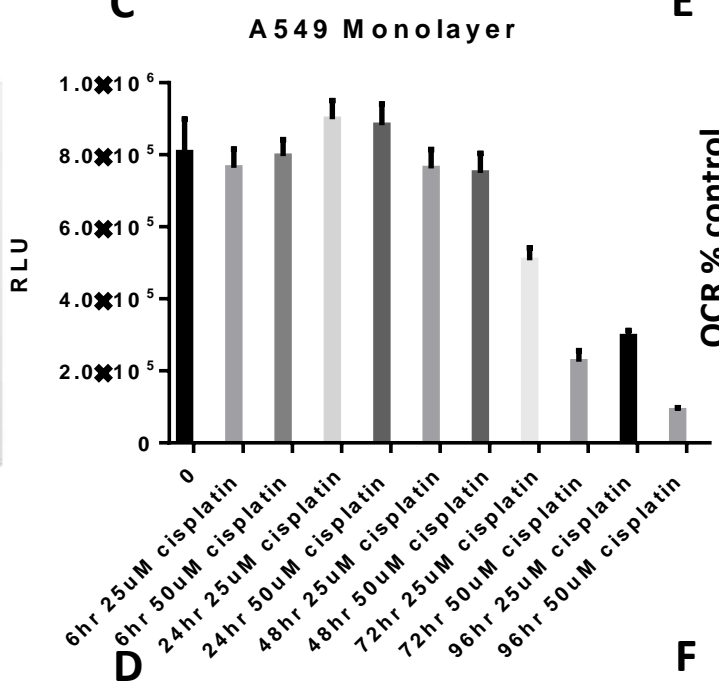**D**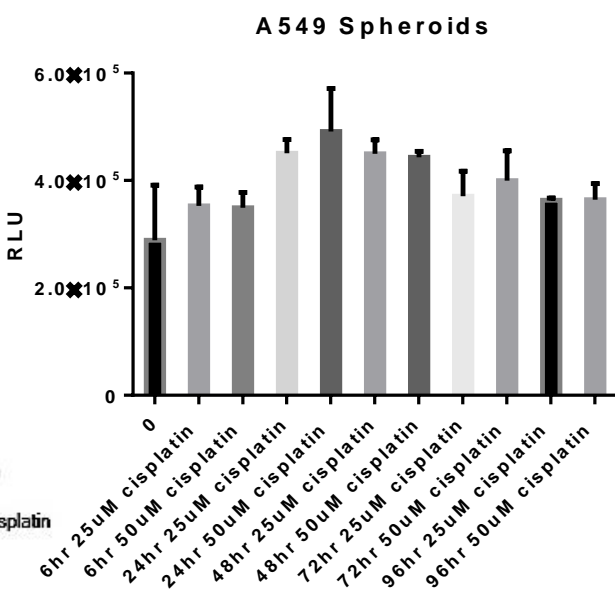**E**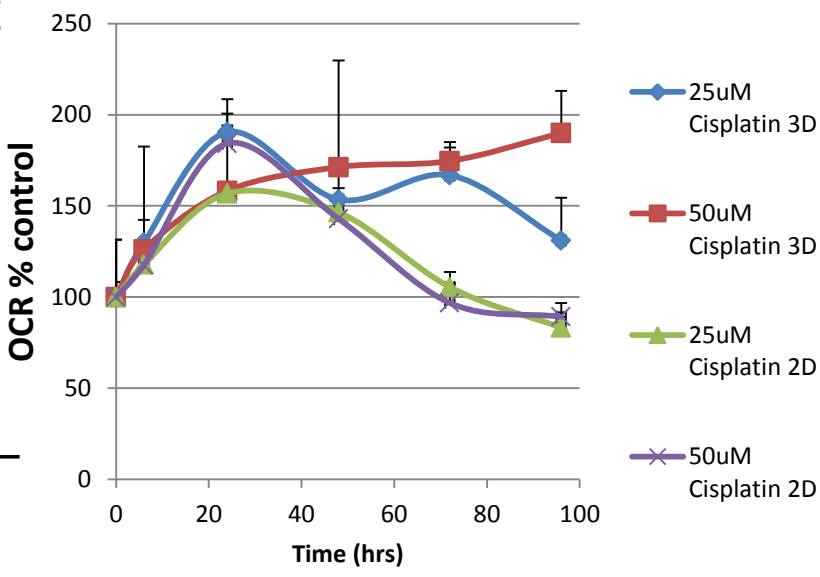**F**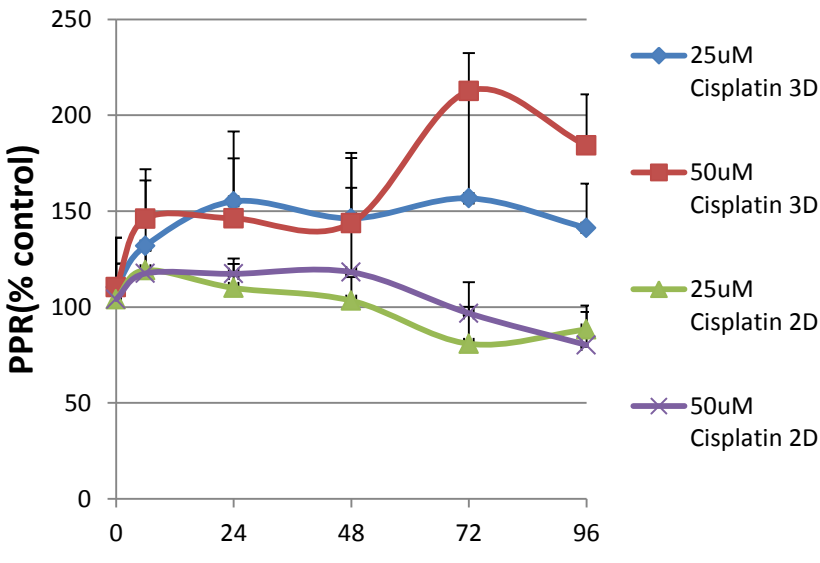

**Supplemental Figure 10: Effects of cisplatin on 3D spheroid metabolic phenotype versus 2D monolayer in A549 human lung adenocarcinoma epithelial cell line.** A: Mitochondrial stress test on A549 monolayer treated with 25uM or 50uM cisplatin over 96hrs. N=5 per group, SD shown. B: Mitochondrial stress test on A549 spheroids treated with 25uM or 50uM cisplatin over 96hrs. N=5 per group, SD shown. C: Cell titer-Glo Luminescent Cell Viability ATP assay of A549 monolayer over 96hrs with 25 or 50uM cisplatin treatment. B: Cell titer-Glo Luminescent Cell Viability ATP assay of A549 spheroid over 96hrs with 25 or 50uM cisplatin treatment. N=5, SD shown. E: Basal OCR as % control (from measurement 6) at each time point with 25 or 50uM cisplatin treatment, 2D vs 3D. F: Basal PPR as % control (from measurement 6) at each time point with 25 or 50uM cisplatin treatment, 2D vs 3D.

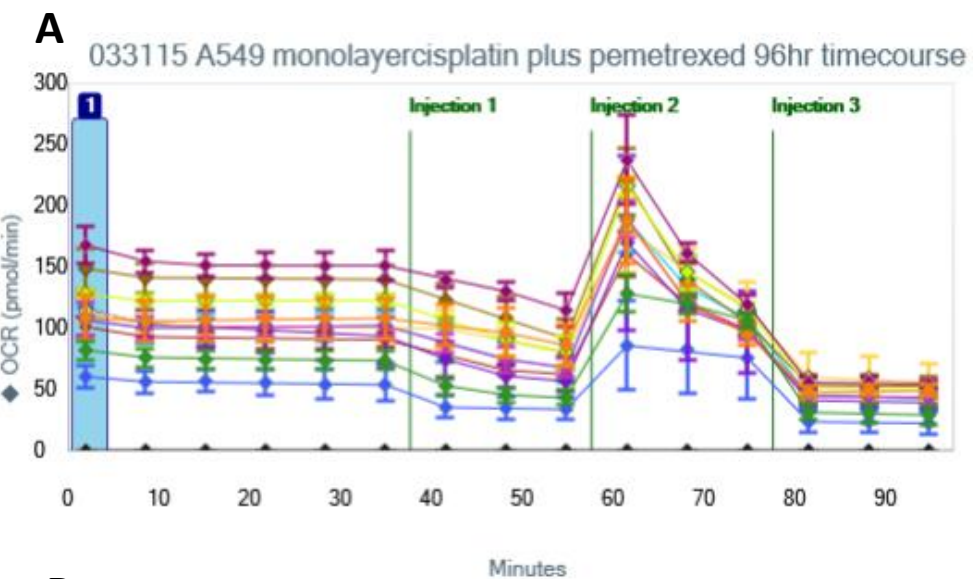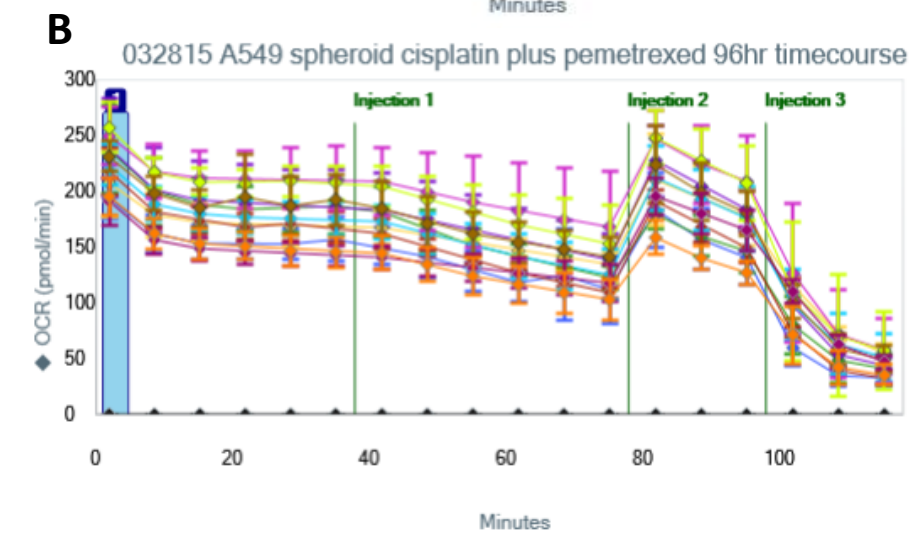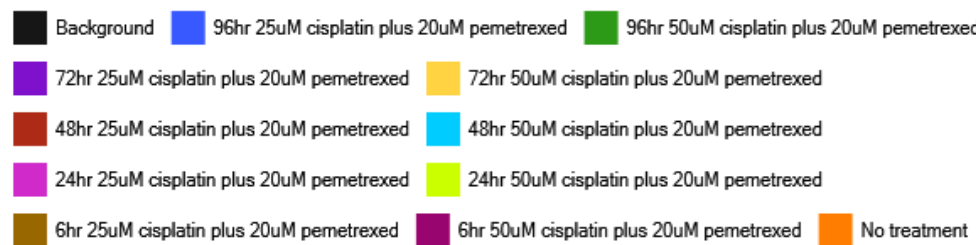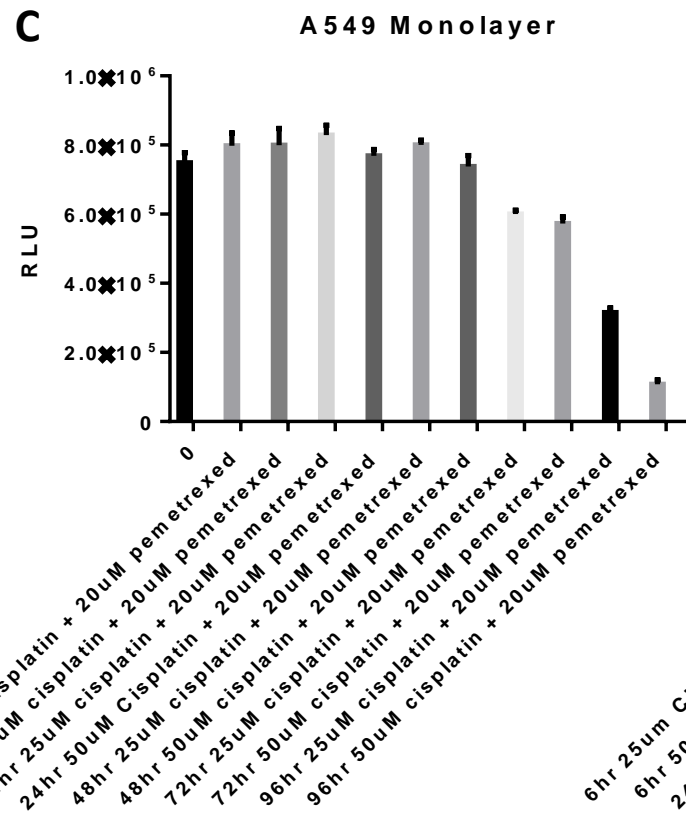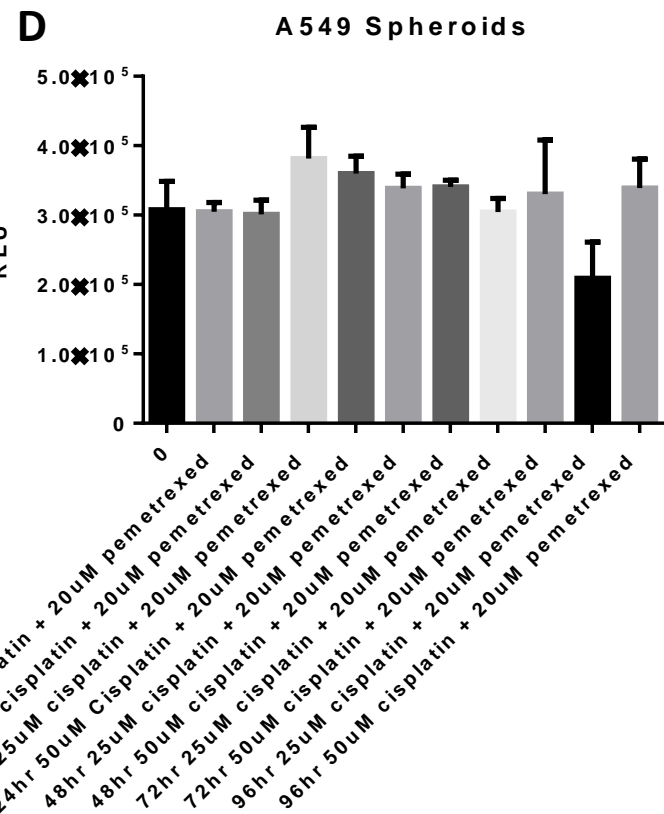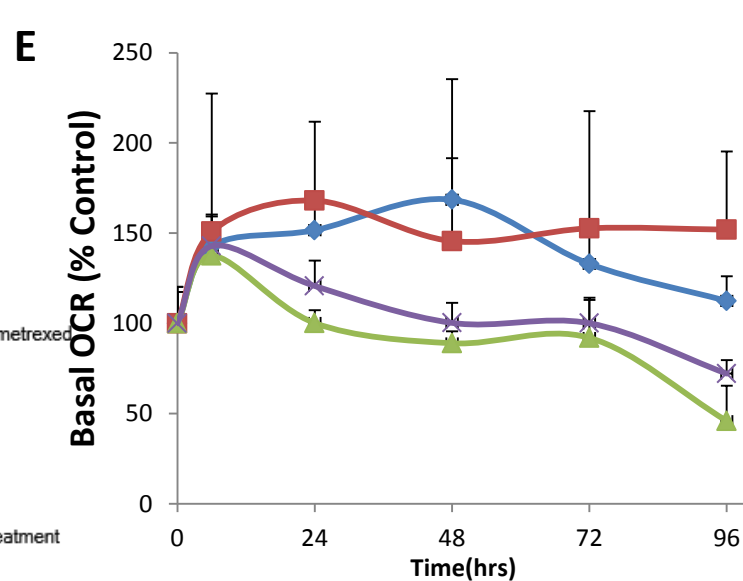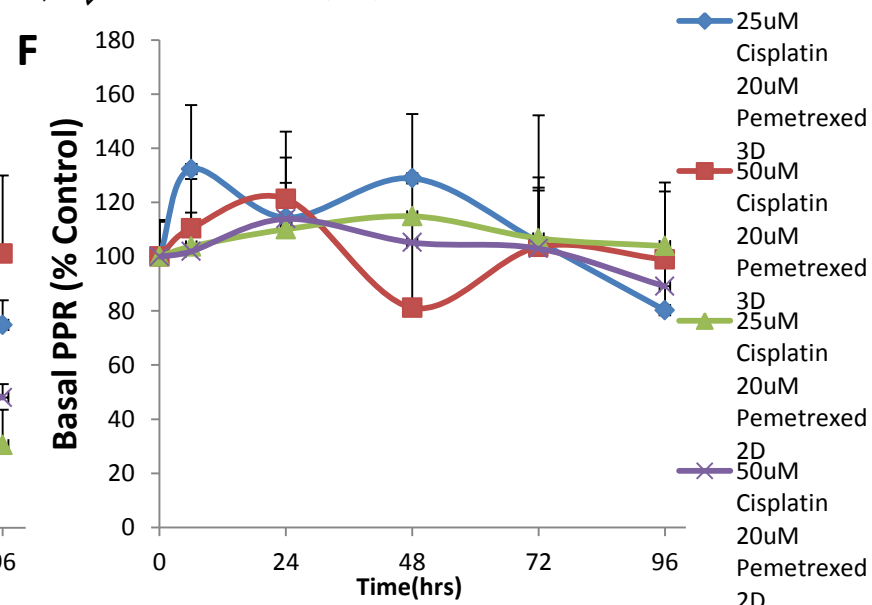



**Supplemental Figure 11: Effects of cisplatin and pemetrexed on 3D spheroid metabolic phenotype versus 2D monolayer in A549 human lung adenocarcinoma epithelial cell line.** A: Mitochondrial stress test on A549 monolayer treated with 25uM or 50uM cisplatin plus 20uM pemetrexed over 96hrs. N=5 per group, SD shown. B: Mitochondrial stress test on A549 spheroids treated with 25uM or 50uM cisplatin plus 20uM pemetrexed over 96hrs. N=5 per group, SD shown. C: Cell titer-Glo Luminescent Cell Viability ATP assay of A549 monolayer over 96hrs with 25 or 50uM cisplatin treatment plus 20uM pemetrexed. D: Cell titer-Glo Luminescent Cell Viability ATP assay of A549 spheroid over 96hrs with 25 or 50uM cisplatin treatment plus 20uM pemetrexed. N=5, SD shown. E: Basal OCR as % control (from measurement 6) at each time point with 25 or 50uM cisplatin treatment plus 20uM pemetrexed, 2D vs 3D. F: Basal PPR as % control (from measurement 6) at each time point with 25 or 50uM cisplatin treatment plus 20uM pemetrexed, 2D vs 3D.

**A****400 mm<sup>3</sup>**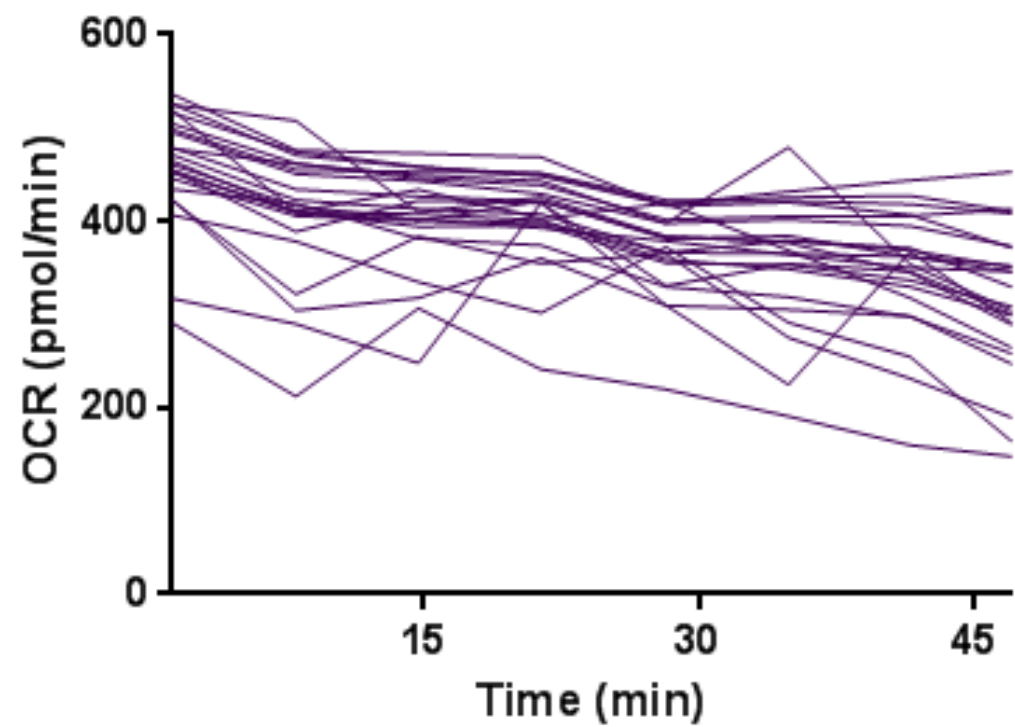**B****2000 mm<sup>3</sup>**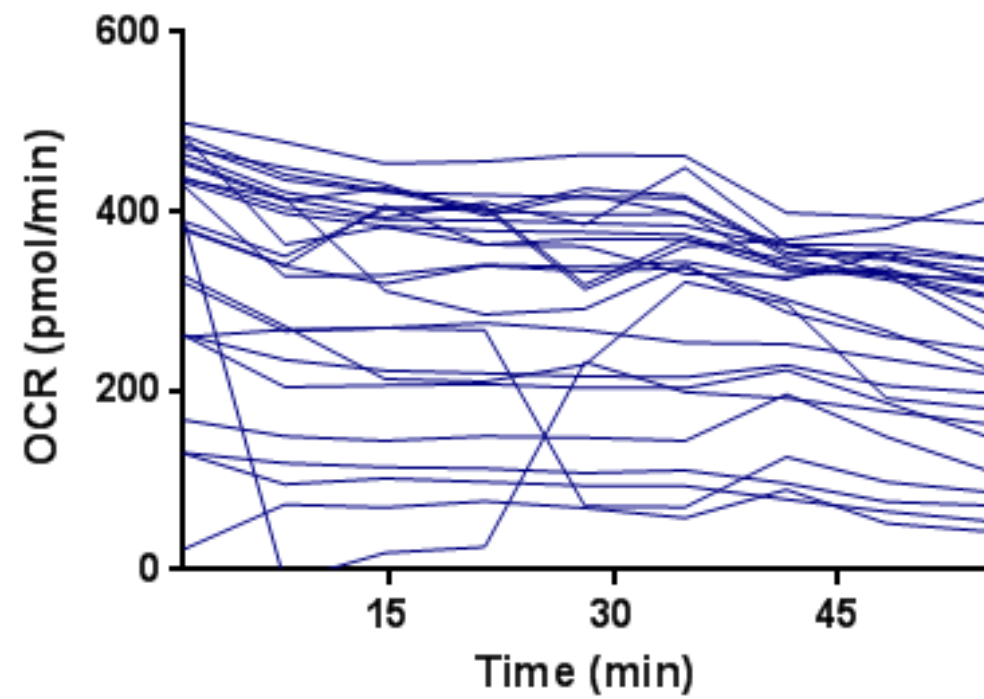

Supplementary Figure 12: **Metabolic Heterogeneity of MiaPaCa-2 Tumor Microtissues** A: OCR of microtissues generated from a 400mm<sup>3</sup> tumor with Injection 1 (FCCP 1uM) and Injection 2 (Rotenone/Antimycin A 1uM) inhibitors. B: OCR of microtissues generated from a 2000mm<sup>3</sup> tumor.

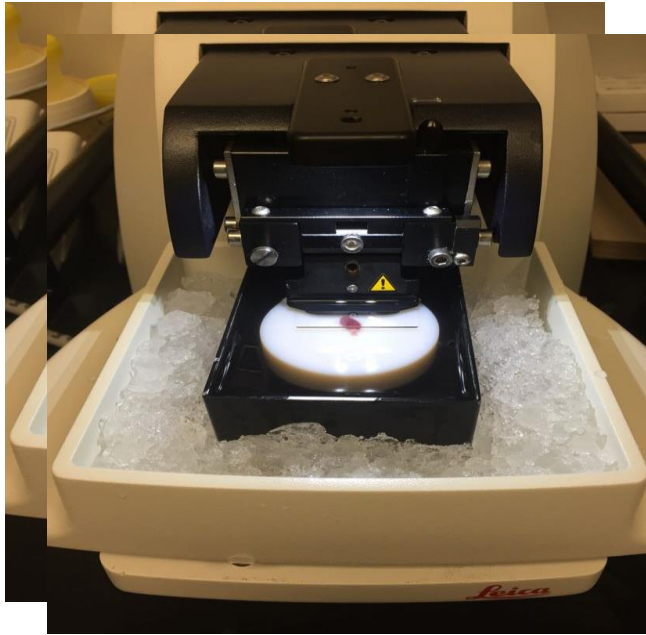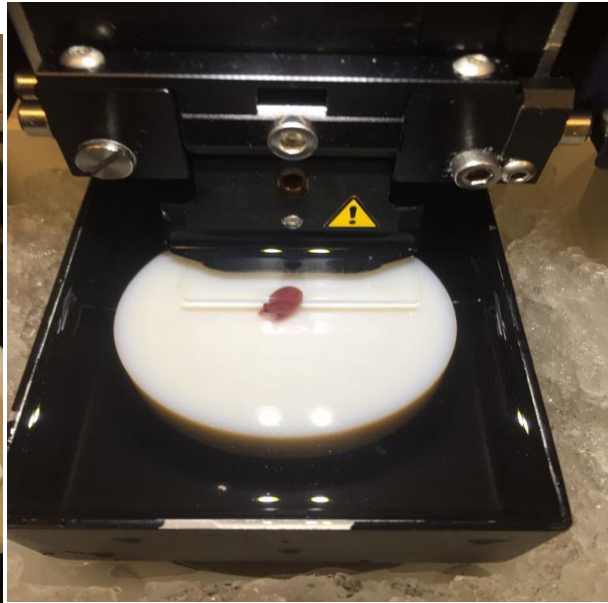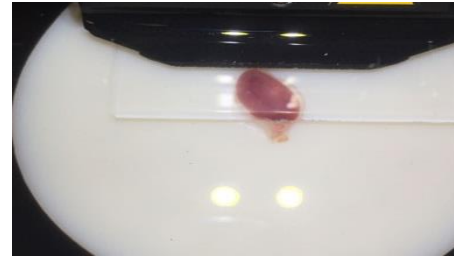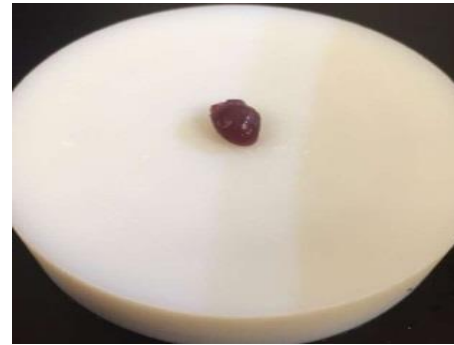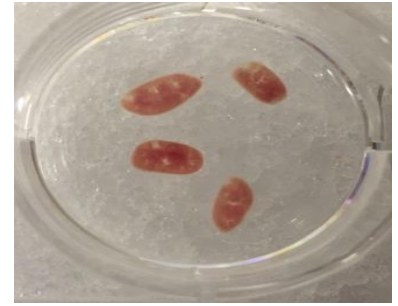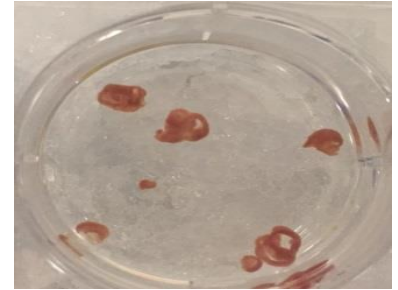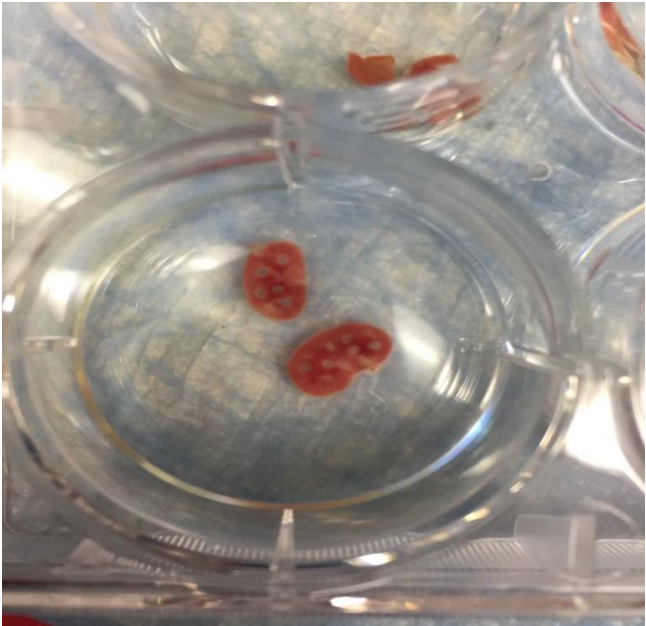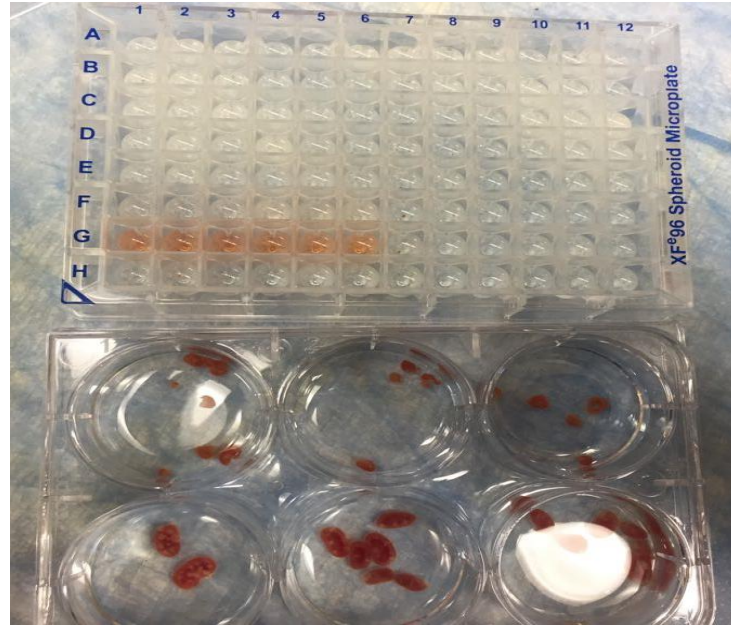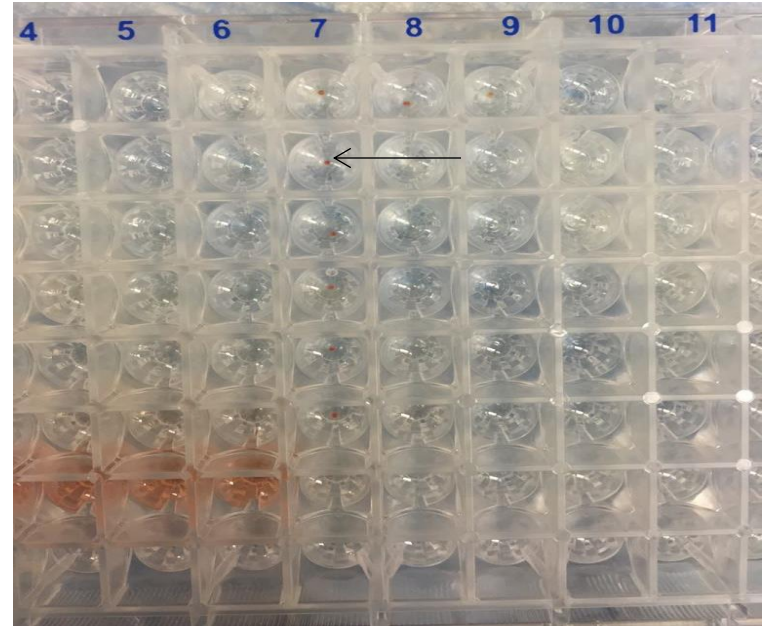

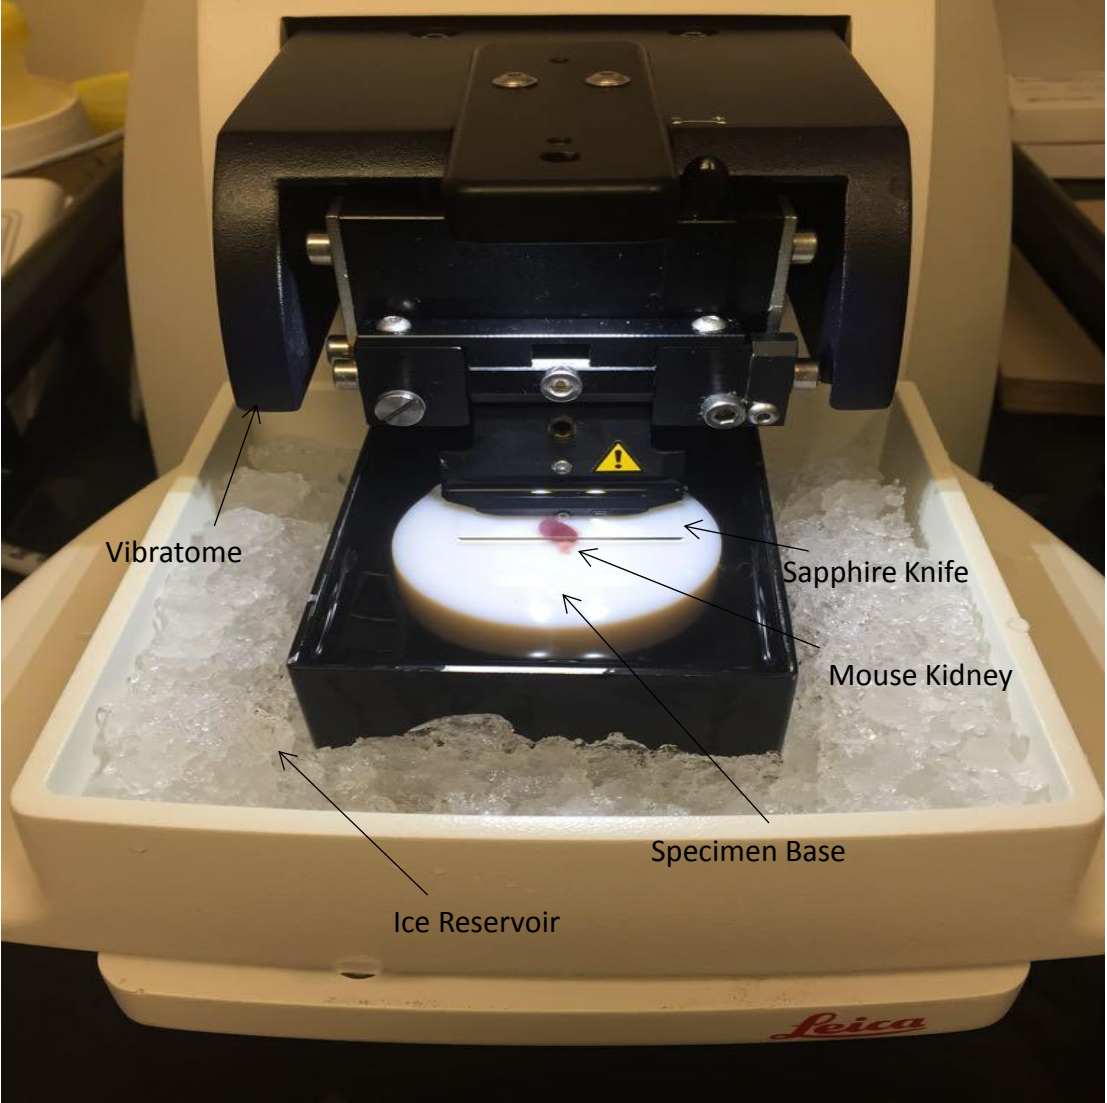

Supplement: 41598_2017_15325_MOESM1_ESM.pdf [file 41598_2017_15325_MOESM1_ESM.pdf]
